# Supplementary material for: The Rise of Heatstroke as a Method of Depopulating Pigs and Poultry: Implications for the US Veterinary Profession
Source: MDPI journal article supplement (doi:10.3390/ani13010140), 2022-12-29
Supplement: s1 [file s1]

b6

| Premises | Incident Site | Special ID    | Production Type               | Incident  | Euthanasia Method                                   | Euth Complete |
|----------|---------------|---------------|-------------------------------|-----------|-----------------------------------------------------|---------------|
|          | New York      | Ulster 01     | Backyard Producer             | HPAI 2022 | KEDS                                                | 2/28/2022     |
|          | New York      | Dutchess 01   | Backyard Producer             | HPAI 2022 | Cervical Dislocation                                | 2/26/2022     |
|          | Michigan      | Kalamazoo 01  | Backyard Producer             | HPAI 2022 | CO2 Cart/Container                                  | 2/24/2022     |
|          | Maine         | Knox 02       | Backyard Producer             | HPAI 2022 | CO2 Cart/Container                                  | 2/23/2022     |
|          | Indiana       | Dubois 03     | Commercial Turkey Meat Bird   | HPAI 2022 | Foam                                                | 2/23/2022     |
|          | New York      | Suffolk 01    | Backyard Producer             | HPAI 2022 | Cervical Dislocation                                | 2/20/2022     |
|          | Indiana       | Greene 02     | Commercial Turkey Meat Bird   | HPAI 2022 | Foam                                                | 2/19/2022     |
|          | Maine         | Knox 01       | Backyard Producer             | HPAI 2022 | CO2 Cart/Container                                  | 2/19/2022     |
|          | Indiana       | Greene 01     | Commercial Turkey Meat Bird   | HPAI 2022 | Foam                                                | 2/18/2022     |
|          | Kentucky      | Fulton 01     | Commercial Broiler Production | HPAI 2022 | Ventilation Shutdown Plus/Foam/Cervical Dislocation | 2/15/2022     |
|          | Indiana       | Dubois 02     | Commercial Turkey Meat Bird   | HPAI 2022 | Foam                                                | 2/15/2022     |
|          | Kentucky      | Webster 01    | Commercial Turkey Meat Bird   | HPAI 2022 | Ventilation Shutdown Plus/Foam                      | 2/15/2022     |
|          | Virginia      | Fauquier 01   | Backyard Producer             | HPAI 2022 | CO2 Cart/Container                                  | 2/12/2022     |
|          | Indiana       | Dubois 01     | Commercial Turkey Meat Bird   | HPAI 2022 | Foam                                                | 2/9/2022      |
|          | Pennsylvania  | Delaware 01   | Live Bird Sales / Slaughter   | LPAI 2022 | Cervical Dislocation/Exsanguination                 | 1/7/2022      |
|          | Minnesota     | Kandiyohi 001 | Commercial Turkey Meat Bird   | LPAI 2022 | Humane/Controlled Slaughter                         | 12/11/2021    |
|          | Minnesota     | Kandiyohi 002 | Commercial Turkey Meat Bird   | LPAI 2022 | Foam                                                | 12/9/2021     |
|          | California    | Stanislaus 01 | Commercial Quail Producer     | LPAI 2021 | CO2 Cart/Container                                  | 10/13/2021    |
|          | Pennsylvania  | York 01       | Other                         | LPAI 2021 | CO2 Cart/Container                                  | 6/11/2021     |

| Incident Site  | Special ID       | Production Type                            | Incident  | Euthanasia Method                           | Euth Complete |
|----------------|------------------|--------------------------------------------|-----------|---------------------------------------------|---------------|
| Delaware       | New Castle 01    | Commercial Table Egg Layer                 | HPAI 2022 | VSD+ heat/ CO2                              | 3/1/2022      |
| Iowa           | Pottawattamie 01 | Backyard Producer                          | HPAI 2022 | KEDS                                        | 3/1/2022      |
| Connecticut    | New London 01    | Backyard Producer                          | HPAI 2022 | CO2/CED                                     | 3/1/2022      |
| Indiana        | Dubois 04        | Commercial Turkey Meat Bird                | HPAI 2022 | Foam                                        | 3/1/2022      |
| Missouri       | Bates 01         | Backyard Producer                          | HPAI 2022 | CO2 Cart/Container                          | 3/5/2022      |
| Missouri       | Stoddard 01      | Commercial Broiler Production              | HPAI 2022 | VSD+ heat/foam                              | 3/5/2022      |
| Iowa           | Buena Vista 01   | Commercial Turkey Meat Bird                | HPAI 2022 | VSD+ heat                                   | 3/7/2022      |
| South Dakota   | Charles Mix 01   | Commercial Turkey Meat Bird                | HPAI 2022 | VSD+ heat/foam                              | 3/7/2022      |
| Maryland       | Cecil 01         | Commercial Table Egg Layer                 | HPAI 2022 | VSD+ heat/CO2                               | 3/8/2022      |
| Maryland       | Queen Anne's 01  | Commercial Broiler Production              | HPAI 2022 | VSD+ heat                                   | 3/9/2022      |
| Missouri       | Jasper 01        | Commercial Turkey Meat Bird                | HPAI 2022 | Foam                                        | 3/9/2022      |
| Missouri       | Lawrence 01      | Commercial Turkey Breeder Replacement Hens | HPAI 2022 | Foam                                        | 3/9/2022      |
| Delaware       | New Castle 02    | Commercial Table Egg Pullets               | HPAI 2022 | VSD+ heat/CO2                               | 3/11/2022     |
| Kansas         | Franklin 01      | Backyard Producer                          | HPAI 2022 | CO2 Cart/Container                          | 3/12/2022     |
| Illinois       | McLean 01        | Backyard Producer                          | HPAI 2022 | CO2 Cart/Container                          | 3/12/2022     |
| Maine          | Lincoln 01       | Backyard Producer                          | HPAI 2022 | CO2 Cart/Container                          | 3/13/2022     |
| Maryland       | Cecil 02         | Commercial Table Egg Layer                 | HPAI 2022 | VSD+ heat/CO2                               | 3/13/2022     |
| South Dakota   | Charles Mix 02   | Commercial Turkey Meat Bird                | HPAI 2022 | VSD+ heat/foam                              | 3/13/2022     |
| Iowa           | Taylor 01        | Commercial Table Egg Layer                 | HPAI 2022 | VSD+ heat/CO2/Cervical Dislocation          | 3/14/2022     |
| Maine          | York 01          | Backyard Producer                          | HPAI 2022 | CO2 Cart/Container                          | 3/16/2022     |
| Missouri       | Rails 01         | Backyard Producer                          | HPAI 2022 | CO2 Cart/Container                          | 3/16/2022     |
| Nebraska       | Merrick 01       | Backyard Producer                          | HPAI 2022 | CO2/Barbiturate                             | 3/16/2022     |
| Delaware       | Kent 01          | Commercial Broiler Production              | HPAI 2022 | VSD+ heat/foam                              | 3/17/2022     |
| Kansas         | Sedgwick 01      | Backyard Producer                          | HPAI 2022 | Cervical Dislocation                        | 3/17/2022     |
| Maine          | Lincoln 02       | Backyard Producer                          | HPAI 2022 | CO2 Cart/Container                          | 3/18/2022     |
| New Hampshire  | Rockingham 01    | Backyard Producer                          | HPAI 2022 | CO2/Cervical Dislocation                    | 3/18/2022     |
| Maine          | York 02          | Backyard Producer                          | HPAI 2022 | CO2 Cart/Container                          | 3/19/2022     |
| South Dakota   | Kingsbury 01     | Commercial Turkey Meat Bird                | HPAI 2022 | VSD+ heat                                   | 3/19/2022     |
| South Dakota   | Hanson 01        | Commercial Turkey Meat Bird                | HPAI 2022 | VSD+ heat/foam                              | 3/19/2022     |
| Kansas         | Dickinson 01     | Backyard Producer                          | HPAI 2022 | CO2 Cart/Container                          | 3/19/2022     |
| Maine          | Knox 03          | Backyard Producer                          | HPAI 2022 | CO2 Cart/Container                          | 3/21/2022     |
| Iowa           | Warren 01        | Backyard Producer                          | HPAI 2022 | CO2 Cart/Container                          | 3/21/2022     |
| Nebraska       | Butler 01        | Commercial Broiler Production              | HPAI 2022 | VSD+ heat                                   | 3/22/2022     |
| Maryland       | Cecil 04         | Commercial Table Egg Pullets               | HPAI 2022 | VSD+ heat/cervical dislocation              | 3/22/2022     |
| South Dakota   | Hutchinson 01    | Commercial Turkey Meat Bird                | HPAI 2022 | VSD+ heat/foam                              | 3/23/2022     |
| Maine          | Cumberland 01    | Backyard Producer                          | HPAI 2022 | CO2 Cart/Container                          | 3/23/2022     |
| South Dakota   | Edmunds 01       | Commercial Turkey Breeder Hens             | HPAI 2022 | VSD+ heat                                   | 3/23/2022     |
| South Dakota   | Hanson 02        | Commercial Turkey Meat Bird                | HPAI 2022 | VSD+ heat/foam                              | 3/24/2022     |
| South Dakota   | Beadle 02        | Commercial Turkey Meat Bird                | HPAI 2022 | VSD+ heat                                   | 3/24/2022     |
| South Dakota   | Charles Mix 03   | Commercial Turkey Meat Bird                | HPAI 2022 | VSD+ heat/foam                              | 3/24/2022     |
| Iowa           | Buena Vista 02   | Commercial Table Egg Layer                 | HPAI 2022 | VSD+ heat/CO2                               | 3/24/2022     |
| Iowa           | Buena Vista 03   | Commercial Turkey Meat Bird                | HPAI 2022 | Foam/KEDS                                   | 3/24/2022     |
| South Dakota   | Beadle 01        | Commercial Turkey Meat Bird                | HPAI 2022 | VSD+ heat                                   | 3/24/2022     |
| South Dakota   | Kingsbury 02     | Commercial Table Egg Layer                 | HPAI 2022 | CO2 Cart/Container                          | 3/24/2022     |
| Nebraska       | Butler 02        | Commercial Broiler Production              | HPAI 2022 | VSD+ heat                                   | 3/25/2022     |
| Michigan       | Macomb 01        | Backyard Producer                          | HPAI 2022 | Injectable                                  | 3/25/2022     |
| Kansas         | Mitchell 01      | Backyard Producer                          | HPAI 2022 | CO2 Cart/Container                          | 3/26/2022     |
| Minnesota      | Mower 01         | Backyard Producer                          | HPAI 2022 | KEDS                                        | 3/26/2022     |
| South Dakota   | Jerauld 01       | Commercial Turkey Meat Bird                | HPAI 2022 | VSD+ heat/foam                              | 3/26/2022     |
| South Dakota   | Hutchinson 02    | Commercial Turkey Meat Bird                | HPAI 2022 | VSD+ heat/foam                              | 3/26/2022     |
| Nebraska       | Holt 01          | Backyard Producer                          | HPAI 2022 | Injectable/Barbiturate/cervical dislocation | 3/26/2022     |
| South Dakota   | Bon Homme 01     | Backyard Producer                          | HPAI 2022 | CO2 Cart/Container                          | 3/27/2022     |
| Iowa           | Franklin 01      | Commercial Table Egg Pullets               | HPAI 2022 | VSD+ heat                                   | 3/27/2022     |
| Missouri       | Gentry 01        | Backyard Producer                          | HPAI 2022 | CO2 Cart/Container                          | 3/27/2022     |
| Minnesota      | Stearns 01       | Commercial Turkey Meat Bird                | HPAI 2022 | Foam/KEDS/captive bolt                      | 3/27/2022     |
| South Dakota   | Clark 01         | Commercial Turkey Meat Bird                | HPAI 2022 | VSD+ heat/foam                              | 3/28/2022     |
| Wyoming        | Park 01          | Backyard Producer                          | HPAI 2022 | KEDS                                        | 3/28/2022     |
| North Carolina | Johnston 01      | Commercial Turkey Meat Bird                | HPAI 2022 | Foam                                        | 3/28/2022     |
| Maine          | Washington 01    | Backyard Producer                          | HPAI 2022 | CO2 Cart/Container                          | 3/28/2022     |
| South Dakota   | Hutchinson 03    | Commercial Turkey Meat Bird                | HPAI 2022 | VSD+ heat/foam                              | 3/28/2022     |
| Minnesota      | Meeker 01        | Commercial Turkey Meat Bird                | HPAI 2022 | VSD+ heat/foam                              | 3/28/2022     |
| New York       | Suffolk 03       | Backyard Producer                          | HPAI 2022 | CO2 Cart/Container                          | 3/29/2022     |
| South Dakota   | McPherson 01     | Commercial Turkey Meat Bird                | HPAI 2022 | VSD+ heat/foam                              | 3/29/2022     |
| Wyoming        | Johnson 01       | Backyard Producer                          | HPAI 2022 | Euthanasia                                  | 3/29/2022     |
| Maine          | Knox 04          | Backyard Producer                          | HPAI 2022 | CO2 Cart/Container                          | 3/29/2022     |
| Iowa           | Hamilton 01      | Commercial Turkey Meat Bird                | HPAI 2022 | Foam                                        | 3/29/2022     |
| New York       | Suffolk 02       | Commercial Upland Gamebird Producer        | HPAI 2022 | CO2 Cart/Container                          | 3/30/2022     |
| New York       | Suffolk 02       | Commercial Upland Gamebird Producer        | HPAI 2022 | CO2 Cart/Container                          | 3/30/2022     |
| Minnesota      | Kandiyohi 01     | Commercial Turkey Meat Bird                | HPAI 2022 | VSD+ heat                                   | 3/30/2022     |
| Ohio           | Franklin 01      | Backyard Producer                          | HPAI 2022 | CO2 Cart/Container                          | 3/30/2022     |
| Maine          | Lincoln 03       | Backyard Producer                          | HPAI 2022 | Injectable                                  | 3/30/2022     |
| Massachusetts  | Berkshire 01     | Backyard Producer                          | HPAI 2022 | CO2 Cart/Container                          | 3/30/2022     |
| South Dakota   | Spink 01         | Commercial Turkey Meat Bird                | HPAI 2022 | VSD+ heat/foam                              | 3/30/2022     |

|              |                  |                                |           |                        |           |
|--------------|------------------|--------------------------------|-----------|------------------------|-----------|
| South Dakota | Bon Homme 02     | Commercial Turkey Meat Bird    | HPAI 2022 | VSD+ heat/foam         | 3/30/2022 |
| Iowa         | Buena Vista 04   | Commercial Turkey Meat Bird    | HPAI 2022 | VSD+ heat              | 3/30/2022 |
| Wisconsin    | Jefferson 01     | Commercial Table Egg Layer     | HPAI 2022 | VSD+ heat              | 3/30/2022 |
| Minnesota    | Lac Qui Parle 01 | Commercial Turkey Meat Bird    | HPAI 2022 | VSD+ heat/captive bolt | 3/30/2022 |
| Minnesota    | Stearns 02       | Backyard Producer              | HPAI 2022 | KEDS/captive bolt      | 3/31/2022 |
| Minnesota    | Morrison 01      | Commercial Turkey Meat Bird    | HPAI 2022 | Foam                   | 3/31/2022 |
| South Dakota | Edmunds 02       | Commercial Turkey Breeder Hens | HPAI 2022 | VSD+ heat              | 3/31/2022 |
| South Dakota | Brule 01         | Commercial Turkey Meat Bird    | HPAI 2022 | VSD+ heat/foam         | 3/31/2022 |

| Incident Site  | Special ID      | Production Type                            | Incident  | Euthanasia Method                                                | Euth Complete        |
|----------------|-----------------|--------------------------------------------|-----------|------------------------------------------------------------------|----------------------|
| New York       | Monroe 01       | Backyard Producer                          | HPAI 2022 | CO2 Cart/Container                                               | 4/1/2022             |
| Missouri       | Jasper 02       | Commercial Turkey Meat Bird                | HPAI 2022 | Foam                                                             | 4/1/2022             |
| South Dakota   | McPherson 02    | Commercial Turkey Breeder Hens             | HPAI 2022 | Foam                                                             | 4/1/2022             |
| North Carolina | Johnston 03     | Commercial Turkey Meat Bird                | HPAI 2022 | Foam                                                             | 4/1/2022             |
| Iowa           | Cherokee 01     | Commercial Turkey Meat Bird                | HPAI 2022 | VSD+ Heat                                                        | 4/1/2022             |
| North Dakota   | Dickey 01       | Backyard Producer                          | HPAI 2022 | CO2 Cart/Container                                               | 4/1/2022             |
| Minnesota      | Stearns 03      | Commercial Turkey Meat Bird                | HPAI 2022 | VSD+ Heat/Foam                                                   | 4/2/2022             |
| North Dakota   | Dickey 02       | Commercial Turkey Meat Bird                | HPAI 2022 | CO2 Cart/Container                                               | 4/2/2022             |
| South Dakota   | Edmunds 03      | Commercial Turkey Breeder Replacement Hens | HPAI 2022 | VSD+ Heat & Foam                                                 | 4/2/2022             |
| Wisconsin      | Rock 01         | Backyard Producer                          | HPAI 2022 | CO2 Cart/Container                                               | 4/2/2022             |
| South Dakota   | Charles Mix 04  | Commercial Turkey Meat Bird                | HPAI 2022 | VSD+ Heat/Foam                                                   | 4/2/2022             |
| North Carolina | Johnston 02     | Commercial Turkey Meat Bird                | HPAI 2022 | Foam                                                             | 4/2/2022             |
| Texas          | Erath 01        | Commercial Upland Gamebird Producer        | HPAI 2022 | CO2 Cart/Container                                               | 4/2/2022             |
| North Carolina | Wayne 01        | Commercial Turkey Meat Bird                | HPAI 2022 | Foam                                                             | 4/2/2022             |
| Iowa           | Hamilton 02     | Commercial Turkey Poult Supplier           | HPAI 2022 | VSD+ Heat                                                        | 4/2/2022             |
| Minnesota      | Dodge 01        | Commercial Turkey Meat Bird                | HPAI 2022 | Foam                                                             | 4/3/2022             |
| Minnesota      | LeSueur 01      | Commercial Turkey Meat Bird                | HPAI 2022 | Foam                                                             | 4/3/2022             |
| Iowa           | Sac 01          | Commercial Turkey Meat Bird                | HPAI 2022 | VSD+ Heat                                                        | 4/3/2022             |
| Nebraska       | Scotts Bluff 01 | Backyard Producer                          | HPAI 2022 | Injectable                                                       | 4/3/2022             |
| Minnesota      | Kandiyohi 02    | Commercial Turkey Meat Bird                | HPAI 2022 | Foam                                                             | 4/3/2022             |
| Iowa           | Humboldt 01     | Commercial Table Egg Breeder               | HPAI 2022 | VSD+ Heat                                                        | 4/3/2022             |
| North Carolina | Wayne 02        | Commercial Turkey Meat Bird                | HPAI 2022 | Foam                                                             | 4/4/2022             |
| Illinois       | Carroll 01      | Backyard Producer                          | HPAI 2022 | KEDS                                                             | 4/4/2022             |
| South Dakota   | Lake 01         | Commercial Turkey Meat Bird                | HPAI 2022 | VSD+ Heat & Foam                                                 | 4/4/2022             |
| North Dakota   | LaMoure 01      | Commercial Turkey Meat Bird                | HPAI 2022 | VSD+ Heat & Foam                                                 | 4/4/2022             |
| South Dakota   | Spink 02        | Commercial Turkey Meat Bird                | HPAI 2022 | VSD+ Heat/Foam                                                   | 4/4/2022             |
| Minnesota      | Kandiyohi 03    | Commercial Turkey Breeder Hens             | HPAI 2022 | Foam/Cervical Dislocation<br>VSD+ Heat & Cervical<br>Dislocation | 4/4/2022<br>4/5/2022 |
| Minnesota      | Waseca 01       | Commercial Turkey Meat Bird                | HPAI 2022 | Foam                                                             | 4/5/2022             |
| Minnesota      | Morrison 03     | Commercial Turkey Meat Bird                | HPAI 2022 | Foam                                                             | 4/5/2022             |
| Minnesota      | Kandiyohi 04    | Commercial Turkey Breeder Hens             | HPAI 2022 | Foam                                                             | 4/5/2022             |
| North Dakota   | LaMoure 02      | Commercial Turkey Meat Bird                | HPAI 2022 | VSD+ Heat/Foam                                                   | 4/5/2022             |
| South Dakota   | McPherson 03    | Commercial Turkey Meat Bird                | HPAI 2022 | VSD+ Heat & Foam                                                 | 4/5/2022             |
| Wyoming        | Fremont 01      | Backyard Producer                          | HPAI 2022 | CO2 Cart/Container                                               | 4/5/2022             |
| Minnesota      | Morrison 02     | Commercial Turkey Meat Bird                | HPAI 2022 | Foam                                                             | 4/5/2022             |
| Iowa           | Guthrie 01      | Commercial Table Egg Layer                 | HPAI 2022 | VSD+ heat/CO2                                                    | 4/6/2022             |
| South Dakota   | Faulk 01        | Commercial Turkey Meat Bird                | HPAI 2022 | VSD+ Heat                                                        | 4/6/2022             |
| Iowa           | Hardin 01       | Commercial Turkey Meat Bird                | HPAI 2022 | VSD+ Heat & Foam                                                 | 4/6/2022             |
| Minnesota      | Morrison 04     | Commercial Turkey Meat Bird                | HPAI 2022 | Foam                                                             | 4/6/2022             |
| Minnesota      | Waseca 02       | Commercial Turkey Meat Bird                | HPAI 2022 | Foam/Captive Bolt                                                | 4/6/2022             |
| Maine          | Waldo 01        | Backyard Producer                          | HPAI 2022 | CO2 Cart/Container                                               | 4/6/2022             |
| South Dakota   | Spink 03        | Commercial Turkey Meat Bird                | HPAI 2022 | VSD+ Heat & Foam                                                 | 4/6/2022             |
| South Dakota   | Clark 02        | Commercial Turkey Meat Bird                | HPAI 2022 | VSD+ Heat & Foam                                                 | 4/6/2022             |
| North Dakota   | Cass 01         | Backyard Producer                          | HPAI 2022 | CO2 Cart/Container                                               | 4/6/2022             |
| North Carolina | Wayne 03        | Commercial Broiler Production              | HPAI 2022 | Foam                                                             | 4/6/2022             |
| North Carolina | Wayne 04        | Commercial Broiler Production              | HPAI 2022 | Foam                                                             | 4/6/2022             |
| Minnesota      | Becker 01       | Commercial Turkey Meat Bird                | HPAI 2022 | Foam                                                             | 4/6/2022             |
| Minnesota      | Big Stone 01    | Commercial Turkey Meat Bird                | HPAI 2022 | VSD+ Heat & Foam                                                 | 4/6/2022             |
| Missouri       | Lawrence 02     | Commercial Turkey Meat Bird                | HPAI 2022 | Foam                                                             | 4/6/2022             |
| South Dakota   | Beadle 03       | Commercial Turkey Meat Bird                | HPAI 2022 | VSD+ Heat & Foam                                                 | 4/7/2022             |
| New York       | Orleans 01      | Backyard Producer                          | HPAI 2022 | CO2/Cervical Dislocation                                         | 4/7/2022             |
| Wisconsin      | Racine 01       | Backyard Producer                          | HPAI 2022 | KEDS                                                             | 4/7/2022             |
| North Carolina | Wayne 05        | Commercial Turkey Meat Bird                | HPAI 2022 | Foam                                                             | 4/7/2022             |
| South Dakota   | McPherson 04    | Commercial Turkey Meat Bird                | HPAI 2022 | VSD+ Heat & Foam                                                 | 4/7/2022             |
| Missouri       | Dade 01         | Commercial Turkey Meat Bird                | HPAI 2022 | Foam                                                             | 4/7/2022             |
| South Dakota   | Clark 03        | Commercial Turkey Meat Bird                | HPAI 2022 | VSD+ Heat & Foam                                                 | 4/7/2022             |
| Wyoming        | Park 02         | Backyard Producer                          | HPAI 2022 | CO2 Cart/Container                                               | 4/7/2022             |
| Minnesota      | Kandiyohi 05    | Commercial Turkey Breeder Hens             | HPAI 2022 | Foam                                                             | 4/7/2022             |
| Minnesota      | Stearns 04      | Commercial Turkey Meat Bird                | HPAI 2022 | Foam                                                             | 4/7/2022             |
| Minnesota      | Otter Tail 01   | Commercial Turkey Meat Bird                | HPAI 2022 | Foam                                                             | 4/7/2022             |
| Minnesota      | Renville 01     | Commercial Turkey Meat Bird                | HPAI 2022 | Foam                                                             | 4/8/2022             |
| New York       | Fulton 01       | Backyard Producer                          | HPAI 2022 | KEDS                                                             | 4/8/2022             |
| Colorado       | Pitkin 01       | Backyard Producer                          | HPAI 2022 | Other                                                            | 4/8/2022             |
| Minnesota      | LeSueur 02      | Commercial Turkey Meat Bird                | HPAI 2022 | Foam                                                             | 4/8/2022             |
| South Dakota   | Edmunds 04      | Commercial Turkey Meat Bird                | HPAI 2022 | VSD+ Heat & Foam                                                 | 4/8/2022             |
| Indiana        | Elkhart 01      | Commercial Duck Breeder                    | HPAI 2022 | KEDS                                                             | 4/8/2022             |
| Minnesota      | Meeker 02       | Commercial Turkey Meat Bird                | HPAI 2022 | VSD+ Heat                                                        | 4/8/2022             |
| Montana        | Judith Basin 01 | Backyard Producer                          | HPAI 2022 | Cervical Dislocation                                             | 4/8/2022             |
| North Dakota   | Stutsman 01     | Backyard Producer                          | HPAI 2022 | CO2 Cart/Container                                               | 4/8/2022             |

|                |                    |                                     |           |                                           |           |
|----------------|--------------------|-------------------------------------|-----------|-------------------------------------------|-----------|
| Minnesota      | Stearns 05         | Commercial Turkey Meat Bird         | HPAI 2022 | Foam                                      | 4/8/2022  |
| Minnesota      | Swift 01           | Commercial Turkey Meat Bird         | HPAI 2022 | Foam                                      | 4/8/2022  |
| South Dakota   | Yankton 01         | Commercial Turkey Meat Bird         | HPAI 2022 | VSD+ Heat & Foam                          | 4/9/2022  |
| Montana        | Cascade 01         | Backyard Producer                   | HPAI 2022 | CO2 Cart/Container                        | 4/9/2022  |
| Wisconsin      | Barron 01          | Commercial Turkey Meat Bird         | HPAI 2022 | Foam                                      | 4/10/2022 |
| Minnesota      | Todd 01            | Commercial Turkey Meat Bird         | HPAI 2022 | Foam                                      | 4/10/2022 |
| Minnesota      | Morrison 05        | Commercial Turkey Meat Bird         | HPAI 2022 | Foam                                      | 4/10/2022 |
| Wyoming        | Sheridan 01        | Backyard Producer                   | HPAI 2022 | All birds died. No depopulation.          | 4/11/2022 |
| Kansas         | McPherson 01       | Commercial Turkey Breeder Hens      | HPAI 2022 | Foam                                      | 4/11/2022 |
| Montana        | Toole 01           | Backyard Producer                   | HPAI 2022 | Other                                     | 4/11/2022 |
| Minnesota      | Yellow Medicine 01 | Commercial Turkey Meat Bird         | HPAI 2022 | VSD+ Heat                                 | 4/11/2022 |
| Minnesota      | Morrison 06        | Commercial Broiler Production       | HPAI 2022 | VSD+ Heat                                 | 4/11/2022 |
| Minnesota      | Kandiyohi 06       | Commercial Turkey Meat Bird         | HPAI 2022 | Foam                                      | 4/11/2022 |
| Minnesota      | Waseca 03          | Commercial Turkey Meat Bird         | HPAI 2022 | VSD+ Heat/Cervical Dislocation            | 4/12/2022 |
| Minnesota      | Benton 02          | Backyard Producer                   | HPAI 2022 | KEDS                                      | 4/12/2022 |
| Minnesota      | Blue Earth 01      | Commercial Turkey Meat Bird         | HPAI 2022 | Foam                                      | 4/12/2022 |
| Minnesota      | Benton 01          | Backyard Producer                   | HPAI 2022 | Other                                     | 4/12/2022 |
| Michigan       | Menominee 01       | Backyard Producer                   | HPAI 2022 | CO2 Cart/Container                        | 4/12/2022 |
| North Carolina | Wayne 06           | Commercial Broiler Production       | HPAI 2022 | Foam                                      | 4/12/2022 |
| North Dakota   | Barnes 01          | Backyard Producer                   | HPAI 2022 | Other                                     | 4/12/2022 |
| Indiana        | Elkhart 02         | Commercial Duck Meat Bird           | HPAI 2022 | KEDS                                      | 4/13/2022 |
| Minnesota      | Blue Earth 02      | Commercial Turkey Meat Bird         | HPAI 2022 | Foam                                      | 4/13/2022 |
| Michigan       | Menominee 02       | Backyard Producer                   | HPAI 2022 | CO2 Cart/Container                        | 4/13/2022 |
| Minnesota      | Meeker 03          | Commercial Turkey Meat Bird         | HPAI 2022 | Foam                                      | 4/13/2022 |
| Minnesota      | Otter Tail 02      | Commercial Turkey Meat Bird         | HPAI 2022 | Foam                                      | 4/13/2022 |
| Idaho          | Caribou 01         | Backyard Producer                   | HPAI 2022 | N/A; all birds died prior to depopulation | 4/14/2022 |
| Michigan       | Macomb 02          | Backyard Producer                   | HPAI 2022 | CO2 Cart/Container                        | 4/14/2022 |
| Wisconsin      | Polk 01            | Commercial Turkey Meat Bird         | HPAI 2022 | Foam                                      | 4/14/2022 |
| Utah           | Utah 01            | Backyard Producer                   | HPAI 2022 | Injectable                                | 4/14/2022 |
| South Dakota   | Deuel 01           | Commercial Upland Gamebird Producer | HPAI 2022 | Other                                     | 4/14/2022 |
| Wisconsin      | Sheboygan 01       | Backyard Producer                   | HPAI 2022 | CO2 Cart/Container                        | 4/14/2022 |
| Wisconsin      | Columbia 01        | Backyard Producer                   | HPAI 2022 | CO2/Gunshot                               | 4/15/2022 |
| North Dakota   | LaMoure 01         | Backyard Producer                   | HPAI 2022 | All birds died. No depopulation.          | 4/15/2022 |
| Michigan       | Livingston 01      | Backyard Producer                   | HPAI 2022 | CO2 Cart/Container                        | 4/15/2022 |
| Minnesota      | Kandiyohi 07       | Commercial Turkey Meat Bird         | HPAI 2022 | Foam                                      | 4/15/2022 |
| Idaho          | Gooding 01         | Backyard Producer                   | HPAI 2022 | CO2 Cart/Container                        | 4/15/2022 |
| Minnesota      | Morrison 07        | Commercial Table Egg Layer          | HPAI 2022 | VSD+ Heat/CO2                             | 4/15/2022 |
| North Dakota   | Sheridan 01        | Backyard Producer                   | HPAI 2022 | CO2 Cart/Container                        | 4/16/2022 |
| Iowa           | Osceola 01         | Commercial Table Egg Layer          | HPAI 2022 | VSD+ heat/CO2                             | 4/16/2022 |
| Minnesota      | Morrison 08        | Commercial Turkey Meat Bird         | HPAI 2022 | Foam                                      | 4/16/2022 |
| Minnesota      | Morrison 09        | Commercial Turkey Meat Bird         | HPAI 2022 | Foam                                      | 4/16/2022 |
| Minnesota      | Kandiyohi 08       | Commercial Turkey Meat Bird         | HPAI 2022 | Foam/KEDS                                 | 4/16/2022 |
| Minnesota      | Meeker 04          | Commercial Turkey Meat Bird         | HPAI 2022 | Foam/KEDS                                 | 4/16/2022 |
| North Dakota   | Stutsman 02        | Backyard Producer                   | HPAI 2022 | Producer depopulated.                     | 4/17/2022 |
| Pennsylvania   | Lancaster 01       | Commercial Table Egg Layer          | HPAI 2022 | VSD+ Heat                                 | 4/17/2022 |
| Minnesota      | Otter Tail 03      | Commercial Turkey Meat Bird         | HPAI 2022 | VSD+ Heat/KEDS                            | 4/17/2022 |
| Minnesota      | Swift 02           | Commercial Turkey Meat Bird         | HPAI 2022 | Foam                                      | 4/17/2022 |
| Colorado       | La Plata 01        | Backyard Producer                   | HPAI 2022 | CO2 Cart/Container                        | 4/17/2022 |
| Michigan       | Menominee 03       | Backyard Producer                   | HPAI 2022 | Injectable                                | 4/18/2022 |
| Minnesota      | Morrison 10        | Commercial Turkey Meat Bird         | HPAI 2022 | Foam                                      | 4/18/2022 |
| Minnesota      | Stearns 06         | Commercial Turkey Meat Bird         | HPAI 2022 | VSD+ Heat/Captive Bolt                    | 4/19/2022 |
| Minnesota      | Todd 02            | Commercial Turkey Meat Bird         | HPAI 2022 | Foam                                      | 4/19/2022 |
| Minnesota      | Todd 03            | Commercial Turkey Meat Bird         | HPAI 2022 | Foam                                      | 4/19/2022 |
| Indiana        | Elkhart 03         | Commercial Duck Meat Bird           | HPAI 2022 | KEDS                                      | 4/19/2022 |
| Minnesota      | Stearns 07         | Commercial Turkey Meat Bird         | HPAI 2022 | Foam                                      | 4/19/2022 |
| Minnesota      | Morrison 11        | Commercial Turkey Meat Bird         | HPAI 2022 | Foam/KEDS                                 | 4/20/2022 |
| Minnesota      | Todd 04            | Commercial Turkey Meat Bird         | HPAI 2022 | Foam                                      | 4/20/2022 |
| Idaho          | Gooding 02         | Backyard Producer                   | HPAI 2022 | CO2 Cart/Container                        | 4/20/2022 |
| Minnesota      | Todd 05            | Commercial Turkey Meat Bird         | HPAI 2022 | Foam                                      | 4/20/2022 |
| North Dakota   | Renville 01        | Backyard Producer                   | HPAI 2022 | CO2 Cart/Container                        | 4/21/2022 |
| Minnesota      | Otter Tail 04      | Commercial Turkey Meat Bird         | HPAI 2022 | VSD+ Heat                                 | 4/21/2022 |
| Pennsylvania   | Lancaster 04       | Commercial Broiler Production       | HPAI 2022 | VSD+ Heat                                 | 4/21/2022 |
| Idaho          | Madison 01         | Backyard Producer                   | HPAI 2022 | CO2 Cart/Container                        | 4/21/2022 |
| Iowa           | Bremer 01          | Commercial Turkey Meat Bird         | HPAI 2022 | Foam                                      | 4/21/2022 |
| North Dakota   | Richland 01        | Commercial Turkey Meat Bird         | HPAI 2022 | VSD+ Heat & Foam                          | 4/22/2022 |
| Minnesota      | Yellow Medicine 02 | Commercial Turkey Meat Bird         | HPAI 2022 | Foam                                      | 4/22/2022 |
| Minnesota      | Swift 03           | Commercial Turkey Meat Bird         | HPAI 2022 | VSD+ Heat                                 | 4/22/2022 |

|              |                   |                                    |           |                                 |           |
|--------------|-------------------|------------------------------------|-----------|---------------------------------|-----------|
| Colorado     | Montrose 01       | Commercial Broiler Breeder         | HPAI 2022 | CO2 Whole House                 | 4/22/2022 |
| Nebraska     | Dixon 01          | Commercial Table Egg Layer         | HPAI 2022 | VSD+ Heat/CO2                   | 4/22/2022 |
| Minnesota    | Stearns 08        | Commercial Turkey Meat Bird        | HPAI 2022 | Foam                            | 4/23/2022 |
| Pennsylvania | Lancaster 02      | Commercial Table Egg Layer         | HPAI 2022 | VSD+ Heat                       | 4/23/2022 |
| Iowa         | Kossuth 01        | Backyard Producer                  | HPAI 2022 | CO2 Cart/Container              | 4/23/2022 |
| Minnesota    | Rice 01           | Backyard Producer                  | HPAI 2022 | KEDS                            | 4/23/2022 |
| Pennsylvania | Lancaster 03      | Commercial Table Egg Layer         | HPAI 2022 | VSD+ Heat                       | 4/24/2022 |
| Wisconsin    | Polk 02           | Backyard Producer                  | HPAI 2022 | CO2 Cart/Container              | 4/24/2022 |
| Michigan     | Menominee 04      | Backyard Producer                  | HPAI 2022 | CO2 Cart/Container              | 4/25/2022 |
| Montana      | Missoula 01       | Backyard Producer                  | HPAI 2022 | Other                           | 4/25/2022 |
| North Dakota | Richland 02       | Backyard Producer                  | HPAI 2022 | Other                           | 4/26/2022 |
| Wisconsin    | Barron 02         | Commercial Turkey Meat Bird        | HPAI 2022 | Foam                            | 4/27/2022 |
| Michigan     | Saginaw 01        | Backyard Producer                  | HPAI 2022 | CO2 Cart/Container              | 4/27/2022 |
| Vermont      | Caledonia 01      | Backyard Producer                  | HPAI 2022 | CO2 Cart/Container              | 4/27/2022 |
| Minnesota    | Swift 04          | Backyard Producer                  | HPAI 2022 | CO2 Cart/Container              | 4/27/2022 |
| Montana      | Glacier 01        | Backyard Producer                  | HPAI 2022 | CO2 Whole House                 | 4/27/2022 |
| Indiana      | Johnson 01        | Backyard Producer                  | HPAI 2022 | Euthanasia/Cervical             |           |
| Kansas       | Republic 01       | Backyard Producer                  | HPAI 2022 | Dislocation/CO2                 | 4/27/2022 |
| Minnesota    | Carver 01         | Backyard Producer                  | HPAI 2022 | CO2 Cart/Container              | 4/28/2022 |
| Wisconsin    | Barron 03         | Backyard Producer                  | HPAI 2022 | Cervical Dislocation/KEDS       | 4/28/2022 |
| Minnesota    | Stearns 09        | Commercial Turkey Breeder Hens     | HPAI 2022 | Producer depopulated.           | 4/28/2022 |
| Pennsylvania | Lancaster 06      | Commercial Broiler Breeder Pullets | HPAI 2022 | Foam                            | 4/28/2022 |
| Michigan     | Wexford 01        | Backyard Producer                  | HPAI 2022 | Foam                            | 4/28/2022 |
|              |                   |                                    |           | CO2 Cart/Container              | 4/28/2022 |
| Nebraska     | Washington 01     | Backyard Producer                  | HPAI 2022 | Injectable barbiturate/cervical |           |
| Pennsylvania | Lancaster 05      | Commercial Table Egg Layer         | HPAI 2022 | dislocation                     | 4/28/2022 |
| Wisconsin    | Oconto 01         | Other                              | HPAI 2022 | VSD+ Heat                       | 4/29/2022 |
| Wisconsin    | Fond du Lac 01    | Backyard Producer                  | HPAI 2022 | CO2 Cart/Container              | 4/29/2022 |
| Pennsylvania | Lancaster 07      | Commercial Duck Meat Bird          | HPAI 2022 | KEDS                            | 4/29/2022 |
| Montana      | Pondera 01        | Backyard Producer                  | HPAI 2022 | VSD+ Heat                       | 4/29/2022 |
| Michigan     | Branch 01         | Backyard Producer                  | HPAI 2022 | Cervical Dislocation            | 4/29/2022 |
| Minnesota    | Morrison 12       | Backyard Producer                  | HPAI 2022 | Injectable                      | 4/30/2022 |
| Minnesota    | Chisago 01        | Backyard Producer                  | HPAI 2022 | CO2 Cart/Container              | 4/30/2022 |
| Alaska       | Matanuska Susitna | Backyard Producer                  | HPAI 2022 | CO2 Cart/Container              | 4/30/2022 |
| Montana      | Fergus 01         | Backyard Producer                  | HPAI 2022 | CO2 Cart/Container              | 4/30/2022 |
| Oklahoma     | Sequoyah 01       | Commercial Broiler Breeder         | HPAI 2022 | Cervical Dislocation            | 4/30/2022 |
| Utah         | Cache 01          | Commercial Table Egg Layer         | HPAI 2022 | Cervical Dislocation            | 4/30/2022 |
| Nebraska     | Knox 01           | Commercial Table Egg Layer         | HPAI 2022 | VSD+ heat/CO2                   | 5/13/2022 |
|              |                   |                                    |           | VSD+ heat/CO2                   | 5/15/2022 |

(b)(3) Section 1619 of  
the Farm Bill

| Premises | Incident Site | Special ID   | Production Type              | Incident  | Euthanasia Method                 | Euth Complete |
|----------|---------------|--------------|------------------------------|-----------|-----------------------------------|---------------|
|          | Minnesota     | Chisago 02   | Backyard Producer            | HPAI 2022 | KEDS/CO2                          | 5/1/2022      |
|          | Wisconsin     | Barron 04    | Commercial Turkey Meat Bird  | HPAI 2022 | VSD+ Heat                         | 5/1/2022      |
|          | Wisconsin     | Barron 05    | Commercial Turkey Meat Bird  | HPAI 2022 | VSD+ Heat & Foam                  | 5/2/2022      |
|          | South Dakota  | Beadle 04    | Commercial Turkey Meat Bird  | HPAI 2022 | VSD+ Heat & Foam                  | 5/2/2022      |
|          | South Dakota  | Hamlin 01    | Backyard Producer            | HPAI 2022 | N/A                               | 5/2/2022      |
|          | Minnesota     | Chisago 03   | Backyard Producer            | HPAI 2022 | CO2 Cart/Container                | 5/2/2022      |
|          | Montana       | Gallatin 01  | Backyard Producer            | HPAI 2022 | Cervical Dislocation              | 5/2/2022      |
|          | Wisconsin     | Polk 03      | Backyard Producer            | HPAI 2022 | CO2 Cart/Container                | 5/3/2022      |
|          | Minnesota     | Lyon 01      | Commercial Turkey Meat Bird  | HPAI 2022 | Foam                              | 5/3/2022      |
|          | Wisconsin     | Sauk 01      | Backyard Producer            | HPAI 2022 | CO2 Cart/Container                | 5/3/2022      |
|          | South Dakota  | Day 01       | Backyard Producer            | HPAI 2022 | Cervical Dislocation              | 5/3/2022      |
|          | Iowa          | Bremer 02    | Backyard Producer            | HPAI 2022 | CO2 Cart/Container                | 5/3/2022      |
|          | Illinois      | Kane 01      | Backyard Producer            | HPAI 2022 | KEDS                              | 5/4/2022      |
|          | Pennsylvania  | Berks 02     | Commercial Duck Meat Bird    | HPAI 2022 | VSD+ Heat & Foam                  | 5/4/2022      |
|          | Pennsylvania  | Berks 01     | Commercial Duck Breeder      | HPAI 2022 | Foam                              | 5/4/2022      |
|          | Minnesota     | Carver 02    | Backyard Producer            | HPAI 2022 | KEDS                              | 5/4/2022      |
|          | Montana       | Fergus 02    | Backyard Producer            | HPAI 2022 | Cervical Dislocation              | 5/4/2022      |
|          | Wisconsin     | Pierce 01    | Backyard Producer            | HPAI 2022 | CO2 Cart/Container                | 5/5/2022      |
|          | Minnesota     | Anoka 01     | Backyard Producer            | HPAI 2022 | CO2 Cart/Container                | 5/5/2022      |
|          | Wisconsin     | Barron 06    | Commercial Turkey Meat Bird  | HPAI 2022 | VSD+ Heat                         | 5/6/2022      |
|          | Michigan      | Oakland 01   | Backyard Producer            | HPAI 2022 | CO2 Cart/Container                | 5/6/2022      |
|          | Washington    | Pacific 01   | Backyard Producer            | HPAI 2022 | CO2 Cart/Container                | 5/6/2022      |
|          | Oregon        | Linn 01      | Backyard Producer            | HPAI 2022 | CO2 Cart/Container & Captive Bolt | 5/6/2022      |
|          | Washington    | Spokane 01   | Backyard Producer            | HPAI 2022 | CO2 Cart/Container & Gunshot      | 5/7/2022      |
|          | Pennsylvania  | Berks 03     | Commercial Poultry Slaughter | HPAI 2022 | Foam                              | 5/8/2022      |
|          | Pennsylvania  | Berks 04     | Commercial Duck Breeder      | HPAI 2022 | Foam                              | 5/8/2022      |
|          | Pennsylvania  | Lancaster 08 | Commercial Table Egg Layer   | HPAI 2022 | VSD+ Heat                         | 5/9/2022      |
|          | Minnesota     | Todd 06      | Backyard Producer            | HPAI 2022 | CO2 Cart/Container                | 5/9/2022      |
|          | Colorado      | Weld 01      | Commercial Table Egg Layer   | HPAI 2022 | CO2 & VSD+ Heat                   | 5/9/2022      |
|          | Minnesota     | Crow Wing 01 | Backyard Producer            | HPAI 2022 | CO2 Cart/Container                | 5/9/2022      |
|          | Pennsylvania  | Berks 05     | Commercial Duck Meat Bird    | HPAI 2022 | VSD+ Heat                         | 5/10/2022     |
|          | Idaho         | Canyon 01    | Backyard Producer            | HPAI 2022 | CO2 Cart/Container                | 5/10/2022     |
|          | Washington    | Pierce 02    | Backyard Producer            | HPAI 2022 | CO2 Cart/Container                | 5/10/2022     |
|          | Michigan      | Muskegon 01  | Commercial Turkey Meat Bird  | HPAI 2022 | VSD+ Heat                         | 5/10/2022     |
|          | Idaho         | Ada 02       | Backyard Producer            | HPAI 2022 | CO2 Cart/Container                | 5/11/2022     |
|          | Minnesota     | Chisago 04   | Backyard Producer            | HPAI 2022 | CO2 Cart/Container                | 5/11/2022     |
|          | Minnesota     | Chisago 05   | Backyard Producer            | HPAI 2022 | CO2 Cart/Container                | 5/11/2022     |
|          | Minnesota     | Grant 01     | Backyard Producer            | HPAI 2022 | CO2 Cart/Container                | 5/11/2022     |
|          | Utah          | Cache 02     | Backyard Producer            | HPAI 2022 | CO2 Cart/Container                | 5/11/2022     |
|          | Washington    | Clallam 01   | Backyard Producer            | HPAI 2022 | CO2 Cart/Container                | 5/12/2022     |
|          | Washington    | Clallam 02   | Backyard Producer            | HPAI 2022 | CO2 Cart/Container                | 5/12/2022     |
|          | Wisconsin     | Barron 07    | Commercial Turkey Meat Bird  | HPAI 2022 | Foam                              | 5/12/2022     |
|          | Wyoming       | Lincoln 01   | Backyard Producer            | HPAI 2022 | Cervical Dislocation              | 5/12/2022     |
|          | Indiana       | Allen 01     | Backyard Producer            | HPAI 2022 | Injectable                        | 5/12/2022     |
|          | Washington    | Whatcom 01   | Backyard Producer            | HPAI 2022 | CO2 Cart/Container                | 5/13/2022     |
|          | Idaho         | Ada 03       | Backyard Producer            | HPAI 2022 | CO2 Cart/Container                | 5/13/2022     |
|          | Washington    | Okanogan 01  | Backyard Producer            | HPAI 2022 | CO2 Cart/Container                | 5/13/2022     |

(b)(3) Section 1619 of  
the Farm Bill

|              |              |                                |           |                                 |           |
|--------------|--------------|--------------------------------|-----------|---------------------------------|-----------|
| Wisconsin    | Marinette 01 | Backyard Producer              | HPAI 2022 | CO2 Cart/Container              | 5/14/2022 |
| Washington   | Pierce 01    | Backyard Producer              | HPAI 2022 | CO2 Cart/Container & Gunshot    | 5/14/2022 |
| Pennsylvania | Berks 06     | Commercial Table Egg Breeder   | HPAI 2022 | VSD+ Heat                       | 5/15/2022 |
| Minnesota    | Clay 01      | Backyard Producer              | HPAI 2022 | N/A                             | 5/15/2022 |
| Wisconsin    | Dunn 01      | Backyard Producer              | HPAI 2022 | Cervical Dislocation            | 5/15/2022 |
| Illinois     | Boone 01     | Backyard Producer              | HPAI 2022 | Cervical Dislocation            | 5/16/2022 |
| Pennsylvania | Berks 07     | Commercial Table Egg Layer     | HPAI 2022 | VSD+ Heat                       | 5/16/2022 |
| Idaho        | Canyon 02    | Backyard Producer              | HPAI 2022 | CO2 Cart/Container              | 5/16/2022 |
| Idaho        | Ada 04       | Backyard Producer              | HPAI 2022 | CO2 Cart/Container & Injectable | 5/17/2022 |
| Utah         | Salt Lake 01 | Backyard Producer              | HPAI 2022 | CO2 Cart/Container              | 5/17/2022 |
| North Dakota | Burke 01     | Backyard Producer              | HPAI 2022 | CO2 Cart/Container              | 5/17/2022 |
| Pennsylvania | Berks 08     | Commercial Duck Breeder        | HPAI 2022 | Foam                            | 5/18/2022 |
| New Jersey   | Monmouth 01  | Backyard Producer              | HPAI 2022 | CO2 Cart/Container              | 5/18/2022 |
| Minnesota    | Kandiyohi 09 | Commercial Turkey Breeder Toms | HPAI 2022 | Foam                            | 5/18/2022 |
| Oregon       | Lane 01      | Backyard Producer              | HPAI 2022 | CO2 Cart/Container              | 5/18/2022 |
| Colorado     | Jefferson 01 | Animal Rescue / Rehabilitation | HPAI 2022 | Injectable                      | 5/18/2022 |
| Minnesota    | Polk 01      | Backyard Producer              | HPAI 2022 | CO2 Cart/Container              | 5/19/2022 |
| Idaho        | Canyon 05    | Backyard Producer              | HPAI 2022 | CO2 Cart/Container              | 5/19/2022 |
| Idaho        | Canyon 04    | Backyard Producer              | HPAI 2022 | CO2 Cart/Container              | 5/19/2022 |
| Idaho        | Canyon 07    | Backyard Producer              | HPAI 2022 | CO2 Cart/Container              | 5/20/2022 |
| Idaho        | Ada 06       | Backyard Producer              | HPAI 2022 | CO2 Cart/Container              | 5/20/2022 |
| Minnesota    | Dakota 01    | Commercial Turkey Meat Bird    | HPAI 2022 | Foam & KEDS                     | 5/20/2022 |
| South Dakota | Codington 01 | Backyard Producer              | HPAI 2022 | Cervical Dislocation            | 5/21/2022 |
| Pennsylvania | Berks 09     | Commercial Duck Breeder        | HPAI 2022 | Foam                            | 5/22/2022 |
| Idaho        | Canyon 09    | Backyard Producer              | HPAI 2022 | CO2 Cart/Container              | 5/23/2022 |
| Utah         | Sanpete 01   | Commercial Turkey Meat Bird    | LPAI 2022 | Humane/Controlled Slaughter     | 5/23/2022 |
| Wisconsin    | Bayfield 01  | Backyard Producer              | HPAI 2022 | CO2 Cart/Container              | 5/23/2022 |
| Idaho        | Ada 09       | Backyard Producer              | HPAI 2022 | CO2 Cart/Container              | 5/23/2022 |
| Washington   | Thurston 01  | Backyard Producer              | HPAI 2022 | CO2 Cart/Container              | 5/24/2022 |
| Idaho        | Canyon 03    | Backyard Producer              | HPAI 2022 | CO2 Cart/Container              | 5/24/2022 |
| Idaho        | Ada 01       | Backyard Producer              | HPAI 2022 | CO2 Cart/Container              | 5/24/2022 |
| Idaho        | Canyon 10    | Backyard Producer              | HPAI 2022 | CO2 Cart/Container              | 5/24/2022 |
| Idaho        | Canyon 06    | Backyard Producer              | HPAI 2022 | CO2 Cart/Container              | 5/25/2022 |
| Washington   | King 01      | Backyard Producer              | HPAI 2022 | CO2 Cart/Container              | 5/26/2022 |
| Idaho        | Ada 10       | Backyard Producer              | HPAI 2022 | CO2 Cart/Container              | 5/26/2022 |
| Washington   | King 02      | Backyard Producer              | HPAI 2022 | CO2 Cart/Container              | 5/27/2022 |
| Washington   | King 03      | Backyard Producer              | HPAI 2022 | CO2 Cart/Container              | 5/27/2022 |
| Minnesota    | Becker 02    | Backyard Producer              | HPAI 2022 | CO2 Cart/Container              | 5/27/2022 |
| Idaho        | Ada 11       | Backyard Producer              | HPAI 2022 | CO2 Cart/Container              | 5/27/2022 |
| Washington   | Snohomish 01 | Backyard Producer              | HPAI 2022 | CO2 Cart/Container              | 5/28/2022 |



(b)(3) Section 1619 of the Farm Bill

| Premises | Incident Site | Special ID    | Production Type              | Incident  | Euthanasia Method                 | Euth Complete |
|----------|---------------|---------------|------------------------------|-----------|-----------------------------------|---------------|
|          | Washington    | Snohomish 02  | Backyard Producer            | HPAI 2022 | Longnetting/CO2<br>Cart/Container | 6/1/2022      |
|          | Pennsylvania  | Berks 10      | Commercial Duck Meat Bird    | HPAI 2022 | VSD+ Heat                         | 6/2/2022      |
|          | Indiana       | Allen 02      | Backyard Producer            | HPAI 2022 | Injectable                        | 6/3/2022      |
|          | Indiana       | Allen 03      | Backyard Producer            | HPAI 2022 | Injectable                        | 6/3/2022      |
|          | Washington    | King 04       | Backyard Producer            | HPAI 2022 | CO2 Cart/Container                | 6/6/2022      |
|          | North Dakota  | McHenry 01    | Backyard Producer            | HPAI 2022 | Cervical Dislocation              | 6/6/2022      |
|          | Washington    | Snohomish 04  | Backyard Producer            | HPAI 2022 | CO2 Cart/Container                | 6/8/2022      |
|          | Washington    | Snohomish 03  | Backyard Producer            | HPAI 2022 | CO2 Cart/Container                | 6/8/2022      |
|          | Oregon        | Polk 01       | Backyard Producer            | HPAI 2022 | CO2 Cart/Container                | 6/9/2022      |
|          | Washington    | Yakima 01     | Backyard Producer            | HPAI 2022 | CO2 Cart/Container                | 6/10/2022     |
|          | Colorado      | Weld 03       | Commercial Table Egg Pullets | HPAI 2022 | CO2 Cart/Container                | 6/10/2022     |
|          | Washington    | Yakima 02     | Backyard Producer            | HPAI 2022 | CO2 Cart/Container                | 6/11/2022     |
|          | Utah          | Salt Lake 02  | Petting Zoo/Exhibition Farm  | HPAI 2022 | CO2 Cart/Container                | 6/11/2022     |
|          | Wyoming       | Sheridan 02   | Backyard Producer            | HPAI 2022 | N/A                               | 6/13/2022     |
|          | Washington    | King 05       | Backyard Producer            | HPAI 2022 | CO2 Cart/Container                | 6/18/2022     |
|          | Washington    | King 06       | Backyard Producer            | HPAI 2022 | Cervical Dislocation              | 6/18/2022     |
|          | Washington    | Yakima 03     | Backyard Producer            | HPAI 2022 | CO2 Cart/Container                | 6/18/2022     |
|          | Washington    | Snohomish 05  | Backyard Producer            | HPAI 2022 | Firearm/CO2 Cart/Container        | 6/20/2022     |
|          | Colorado      | Weld 02       | Commercial Table Egg Layer   | HPAI 2022 | VSD+ heat/CO2                     | 6/24/2022     |
|          | Washington    | Yakima 04     | Backyard Producer            | HPAI 2022 | CO2 Cart/Container                | 6/28/2022     |
|          | Maine         | Cumberland 02 | Backyard Producer            | HPAI 2022 | Injectable                        | 6/29/2022     |
|          | Washington    | Kitsap 01     | Backyard Producer            | HPAI 2022 | CO2 Cart/Container                | 6/30/2022     |

(b)(3) Section 1619 of  
the Farm bill

| Premises | Incident Site | Special ID     | Production Type             | Incident  | Euthanasia Method      | Euth Complete |
|----------|---------------|----------------|-----------------------------|-----------|------------------------|---------------|
|          | Utah          | Salt Lake 03   | Backyard Producer           | HPAI 2022 | CO2 Cart/Container     | 7/1/2022      |
|          | Washington    | Jefferson 01   | Backyard Producer           | HPAI 2022 | CO2 Cart/Container     | 7/2/2022      |
|          | Oregon        | Linn 02        | Backyard Producer           | HPAI 2022 | CO2 Cart/Container     | 7/2/2022      |
|          | Nevada        | Carson City 01 | Backyard Producer           | HPAI 2022 | CO2 Cart/Container     | 7/8/2022      |
|          | Oregon        | Deschutes 01   | Backyard Producer           | HPAI 2022 | CO2 Cart/Container     | 7/11/2022     |
|          | Utah          | Sanpete 01     | Commercial Turkey Meat Bird | HPAI 2022 | VSD+ heat              | 7/13/2022     |
|          | Oregon        | Deschutes 02   | Backyard Producer           | HPAI 2022 | CO2 Cart/Container     | 7/14/2022     |
|          | Oregon        | Deschutes 03   | Backyard Producer           | HPAI 2022 | CO2 Cart/Container     | 7/15/2022     |
|          | Washington    | Snohomish 06   | Backyard Producer           | HPAI 2022 | CO2 Cart/Container     | 7/18/2022     |
|          | Utah          | Sanpete 02     | Commercial Turkey Meat Bird | HPAI 2022 | VSD+ heat/CO2          | 7/19/2022     |
|          | Oregon        | Deschutes 04   | Backyard Producer           | HPAI 2022 | CO2 Cart/Container     | 7/20/2022     |
|          | Florida       | Seminole 01    | Backyard Producer           | HPAI 2022 | CO2 Cart/Container     | 7/22/2022     |
|          | Montana       | Flathead 01    | Backyard Producer           | HPAI 2022 | Cervical Dislocation   | 7/23/2022     |
|          | Washington    | Jefferson 02   | Backyard Producer           | HPAI 2022 | CO2 Cart/Container     | 7/23/2022     |
|          |               |                |                             |           | VSD+ heat/CO2/Cervical |               |
|          | Utah          | Sanpete 03     | Commercial Turkey Meat Bird | HPAI 2022 | Dislocation            | 7/26/2022     |
|          | Oregon        | Coos 01        | Backyard Producer           | HPAI 2022 | Long range shot        | 7/27/2022     |

| Premises | Incident Site | Special ID      | Production Type                | Incident  | Euthanasia Method                                      | Euth Complete |
|----------|---------------|-----------------|--------------------------------|-----------|--------------------------------------------------------|---------------|
| 00RM8UA  | California    | Sacramento 01   | Backyard Producer              | HPAI 2022 | Other                                                  | 8/9/2022      |
| 0012N0A  | Florida       | Osceola 01      | Backyard Producer              | HPAI 2022 | Injectable                                             | 8/11/2022     |
| 00RM5FH  | Pennsylvania  | Northampton 01  | Backyard Producer              | HPAI 2022 | CO2 Cart/Container                                     | 8/11/2022     |
| 00R0EZ6  | Washington    | Walla Walla 01  | Backyard Producer              | HPAI 2022 | CO2 Cart/Container                                     | 8/16/2022     |
| 00HUWA5  | Washington    | Kitsap 02       | Backyard Producer              | HPAI 2022 | CO2 Cart/Container                                     | 8/19/2022     |
| 0018RCR  | California    | Butte 01        | Backyard Producer              | HPAI 2022 | CO2 Cart/Container                                     | 8/19/2022     |
| 00HTED9  | California    | Contra Costa 01 | Backyard Producer              | HPAI 2022 | CO2 Cart/Container                                     | 8/22/2022     |
| 0011EDS  | Utah          | Weber 01        | Backyard Producer              | HPAI 2022 | Injectable<br>CO2/long netting/cervical<br>dislocation | 8/24/2022     |
| 00LXN42  | Washington    | Pierce 04       | Backyard Producer              | HPAI 2022 | CO2 Cart/Container                                     | 8/25/2022     |
| 001MDJR  | Washington    | Cowlitz 01      | Backyard Producer              | HPAI 2022 | CO2 Cart/Container                                     | 8/25/2022     |
| 00RLZJ6  | Georgia       | Henry 01        | Animal Rescue / Rehabilitation | HPAI 2022 | CO2 Cart/Container                                     | 8/26/2022     |
| 000N5TC  | California    | Fresno 01       | Commercial Broiler Breeder     | HPAI 2022 | VSD+ Heat & Foam                                       | 8/26/2022     |
| 000N5SE  | California    | Fresno 02       | Commercial Broiler Breeder     | HPAI 2022 | Foam                                                   | 8/27/2022     |
| 00RLLT3  | Virginia      | Caroline 01     | Non Animal Production          | HPAI 2022 | CO2 Cart/Container                                     | 8/28/2022     |
| 00RLR2X  | California    | Tuolumne 02     | Commercial Turkey Meat Bird    | HPAI 2022 | Cervical Dislocation                                   | 8/28/2022     |
| 00RLRRK  | California    | Tuolumne 01     | Commercial Turkey Meat Bird    | HPAI 2022 | Foam                                                   | 8/29/2022     |
| 00RLRMU  | California    | Sacramento 02   | Commercial Turkey Meat Bird    | HPAI 2022 | CO2 Cart/Container                                     | 8/29/2022     |
| 00RLLGT  | Minnesota     | Meeker 05       | Commercial Turkey Meat Bird    | HPAI 2022 | Foam                                                   | 8/29/2022     |
| 00NB9H0  | California    | Tuolumne 03     | Commercial Turkey Meat Bird    | HPAI 2022 | Foam                                                   | 8/30/2022     |
| 00RLDVV  | Minnesota     | Meeker 06       | Commercial Turkey Meat Bird    | HPAI 2022 | Foam                                                   | 8/30/2022     |
| 00RL07Q  | Indiana       | Elkhart 04      | Backyard Producer              | HPAI 2022 | CO2/Injectable                                         | 8/31/2022     |
| 00RKVZX  | Minnesota     | Hennepin 01     | Backyard Producer              | HPAI 2022 | KEDS                                                   | 8/31/2022     |
