# Supplementary material for: The Rise of Heatstroke as a Method of Depopulating Pigs and Poultry: Implications for the US Veterinary Profession
Source: MDPI journal article supplement (doi:10.3390/ani13010140), 2022-12-29
Supplement: s1 [file s1]

| Incident     | Incident Site | County (Premises) | Premises                             | Indemnity Request Requested          | Euth Complete | Euthanasia Method    | Euthanasia Party        | Disp Complete    | Disposal Method   | Disinfect Complete | Control Zone Open | Control Zone Close | Quarantine Release | Restock Approved? |
|--------------|---------------|-------------------|--------------------------------------|--------------------------------------|---------------|----------------------|-------------------------|------------------|-------------------|--------------------|-------------------|--------------------|--------------------|-------------------|
| LPAI 2017    | Alabama       | CULLMAN           | (b)(3)                               | n/a                                  | 3/23/2017     | Foam                 | Company                 | 3/25/2017        | Burial            | pending            | n/a               | n/a                | No                 |                   |
| LPAI 2017    | Alabama       | JACKSON           | (b)(3)                               | n/a                                  | 3/16/2017     | Cervical dislocation | State/Federal Personnel | 3/16/2017        | Burial            | pending            | n/a               | n/a                | 4/7/2017           |                   |
| LPAI 2017    | Alabama       | LAUDERDALE        | (b)(3) Section 1619 of the Farm bill | n/a                                  | 3/10/2017     | Cervical dislocation | Company                 | 3/11/2017        | Burial            | 3/22/2017          | n/a               | n/a                | 4/6/2017           | Restock Approved  |
| HPAI 2017    | Alabama       | MADISON           |                                      | n/a                                  | 3/11/2017     | Cervical dislocation | State/Federal Personnel | 3/11/2017        | Burial            | pending            | n/a               | n/a                | No                 |                   |
| LPAI 2017    | Alabama       | MADISON           |                                      | n/a                                  | 3/21/2017     | Cervical dislocation | State/Federal Personnel | 3/21/2017        | Burial            | 3/21/2017          | n/a               | n/a                | No                 |                   |
| LPAI 2017    | Alabama       | PICKENS           |                                      | n/a                                  | 3/21/2017     | Foam and CO2         | Company                 | 3/22/2017        | Burial            | pending            | n/a               | n/a                | No                 |                   |
| LPAI 2017    | Georgia       | CHATTOOGA         |                                      | n/a                                  | 3/24/2017     | Foam                 | State/Federal Personnel | 3/25/2017        | Burial            | pending            | n/a               | n/a                | No                 |                   |
| LPAI 2017    | Kentucky      | CHRISTIAN         |                                      | n/a                                  | 3/23/2017     | Cervical dislocation | Producer                | 3/23/2017        | Burial            | pending            | n/a               | n/a                | No                 |                   |
| LPAI 2017    | Kentucky      | CHRISTIAN         |                                      | n/a                                  | 3/17/2017     | Foam                 | Company                 | 3/18/2017        | Burial            | pending            | n/a               | n/a                | No                 |                   |
| LPAI 2017    | Tennessee     | GILES             |                                      | n/a                                  | 3/6/2017      | KEDS                 | Company                 | 3/6/2017         | Burial            | 4/3/2017           | n/a               | n/a                | 4/10/2017          |                   |
| HPAI 2017    | Tennessee     | LINCOLN           |                                      | (b)(3) Section 1619 of the Farm bill | 3/4/2017      | 3/5/2017             | Foam                    | Multiple Parties | 3/8/2017          | Burial             | No                | 3/4/2017           | 4/11/2017          | No                |
| HPAI 2017    | Tennessee     | LINCOLN           | (b)(3) Section 1619 of the Farm bill | n/a                                  | n/a           | n/a                  | n/a                     | n/a              | n/a               | n/a                | n/a               | n/a                | 4/11/2017          |                   |
| HPAI 2017    | Tennessee     | LINCOLN           | (b)(3) Section 1619 of the Farm bill | 3/15/2017                            | 3/17/2017     | Foam                 | Contractor              | 3/17/2017        | Burial            | No                 | 3/14/2017         | 4/11/2017          | No                 |                   |
| HPAI 2017    | Tennessee     | LINCOLN           | (b)(3) Section 1619 of the Farm bill | n/a                                  | n/a           | n/a                  | n/a                     | n/a              | n/a               | n/a                | n/a               | n/a                | 4/11/2017          |                   |
| AI WILP 0317 | Wisconsin     | BARRON            | (b)(3) Section 1619 of the Farm bill | n/a                                  | n/a           | n/a                  | n/a                     | n/a              | Controlled Market | n/a                | n/a               | n/a                | 4/5/2017           |                   |

| Incident      | Incident Site | Start Date (lr Special ID | Species | Production Type             | Euth Comple Euthanasia Method          | Other                |
|---------------|---------------|---------------------------|---------|-----------------------------|----------------------------------------|----------------------|
| HPAI 2017     | Tennessee     | 3/3/2017 none             | Chicken | Commercial Broiler Breeder  | 3/5/2017 Foam                          |                      |
| LPAI 2017     | Tennessee     | 3/9/2017 none             | Chicken | Commercial Broiler Breeder  | 3/6/2017 KEDS                          |                      |
| LPAI 2017     | Alabama       | 3/11/2017 none            | Chicken | Commercial Broiler Breeder  | 3/10/2017 Other                        | Cervical Dislocation |
| HPAI 2017     | Alabama       | 3/11/2017 none            | Poultry | Backyard Producer           | 3/11/2017 Other                        | Cervical Dislocation |
| LPAI 2018     | Missouri      | 3/2/2018 none             | Turkey  | Commercial Turkey Meat Bird | 3/23/2018 Humane/Controlled Slaughter  |                      |
| HPAI 2017     | Tennessee     | 3/5/2017 none             | Chicken | Commercial Broiler Breeder  | 3/17/2017 Foam                         |                      |
| LPAI 2018     | Texas         | 3/6/2018 none             | Chicken | Commercial Broiler Breeder  | 3/8/2018 Foam                          |                      |
| LPAI 2017     | Alabama       | 3/15/2017 none            | Chicken | Commercial Broiler Breeder  | 3/21/2017 Combination-see comments     | Foam / CO2 Gas       |
| LPAI 2017     | Kentucky      | 3/16/2017 none            | Chicken | Commercial Broiler Breeder  | 3/17/2017 Foam                         |                      |
| LPAI 2017     | Alabama       | 3/18/2017 none            | Chicken | Commercial Broiler Breeder  | 3/23/2017 Foam                         |                      |
| LPAI 2017     | Kentucky      | 3/17/2017 none            | Chicken | Backyard Producer           | 3/23/2017 Other                        | Cervical Dislocation |
| AI WI LP 0317 | Wisconsin     | 3/3/2017 none             | Turkey  | Commercial Turkey Meat Bird | 4/14/2017 Humane/Controlled Slaughter  |                      |
| LPAI 2017     | Georgia       | 3/24/2017 none            | Chicken | Commercial Broiler Breeder  | 3/24/2017 Foam                         |                      |
| LPAI 2018     | California    | 10/4/2018 Stanislaus 05   | Turkey  | Commercial Turkey Meat Bird | 11/14/2018 Humane/Controlled Slaughter |                      |
| LPAI 2019     | Minnesota     | 10/19/2018 Kandiyohi 01   | Turkey  | Commercial Turkey Meat Bird | 11/30/2018 Humane/Controlled Slaughter |                      |
| LPAI 2019     | Minnesota     | 10/30/2018 Stearns 01     | Turkey  | Commercial Turkey Meat Bird | 11/16/2018 Humane/Controlled Slaughter |                      |
| LPAI 2019     | Minnesota     | 11/1/2018 Stearns 02      | Turkey  | Commercial Turkey Meat Bird | 11/15/2018 Humane/Controlled Slaughter |                      |
| LPAI 2019     | Minnesota     | 10/20/2018 Kandiyohi 02   | Turkey  | Commercial Turkey Meat Bird | 12/7/2018 Humane/Controlled Slaughter  |                      |
| LPAI 2018     | California    | 9/4/2018 Stanislaus 01    | Turkey  | Commercial Turkey Meat Bird | 9/8/2018 Humane/Controlled Slaughter   |                      |
| LPAI 2019     | Minnesota     | 11/1/2018 Stearns 03      | Turkey  | Commercial Turkey Meat Bird | 12/7/2018 Humane/Controlled Slaughter  |                      |
| LPAI 2018     | California    | 9/6/2018 Stanislaus 02    | Turkey  | Commercial Turkey Meat Bird | 9/21/2018 CO2 Whole House              |                      |
| LPAI 2019     | Minnesota     | 11/2/2018 Stearns 04      | Turkey  | Commercial Turkey Meat Bird | 12/7/2018 Humane/Controlled Slaughter  |                      |
| LPAI 2018     | California    | 9/6/2018 Stanislaus 03    | Poultry | Other                       | 10/5/2018 CO2 Cart/Container           |                      |
| LPAI 2018     | California    | 9/6/2018 Stanislaus 04    | Turkey  | Commercial Turkey Meat Bird | 11/6/2018 Humane/Controlled Slaughter  |                      |
| LPAI 2019     | Minnesota     | 10/22/2018 Kandiyohi 03   | Turkey  | Commercial Turkey Meat Bird | 12/28/2018 Humane/Controlled Slaughter |                      |
| LPAI 2019     | Minnesota     | 10/22/2018 Kandiyohi 04   | Turkey  | Commercial Turkey Meat Bird | 1/11/2019 Humane/Controlled Slaughter  |                      |
| LPAI 2019     | Minnesota     | 1/25/2019 Chippewa 01     | Turkey  | Commercial Turkey Meat Bird | 2/8/2019 Humane/Controlled Slaughter   |                      |
| LPAI 2019     | California    | 4/16/2019 Monterey 01     | Duck    | Commercial Duck Breeder     | 4/25/2019 CO2 Cart/Container           |                      |
| LPAI 2019     | California    | 6/25/2019 Merced 01       | Duck    | Backyard Producer           | 8/14/2019 Humane/Controlled Slaughter  |                      |

| Incident Site | Special ID    | Production Type              | Euthanasia Method  | Incident    | Euth Complete    |
|---------------|---------------|------------------------------|--------------------|-------------|------------------|
| California    | Riverside 285 | Commercial Table Egg Pullets | CO2 Cart/Container | CA VND 2018 | 12/16/2018 14:00 |
| California    | Riverside 351 | Commercial Table Egg Layer   | CO2 Whole House    | CA VND 2018 | 1/19/2019 19:00  |
| California    | Riverside 372 | Commercial Table Egg Layer   | CO2 Cart/Container | CA VND 2018 | 1/21/2019 19:00  |
| California    | Riverside 455 | Commercial Table Egg Layer   | CO2 Cart/Container | CA VND 2018 |                  |

**2019-2020 HPAI events**

**NC- SC Combined Incident H7N3 HPAI and H7N3 LPAI (Commercial Turkey Flocks),**

**March-April 2020**

Depopulation and Disposal

| Disease | Incident Site         | Special ID      | Euthanasia Method | # Euth to Date | Euth Complete | Euthanasia Party |
|---------|-----------------------|-----------------|-------------------|----------------|---------------|------------------|
| LPAI    | <b>North Carolina</b> | Anson 01        | Foam              | 16,372         | 3/16/2020     | State Personnel  |
| LPAI    | <b>North Carolina</b> | Anson 02        | Foam              | 24,068         | 3/16/2020     | State Personnel  |
| LPAI    | <b>North Carolina</b> | Union 01        | Foam              | 12,900         | 3/15/2020     | State Personnel  |
| LPAI    | <b>North Carolina</b> | Union 02        | Other             | 65,071         | 3/15/2020     | Company          |
| LPAI    | <b>North Carolina</b> | Union 03        | Foam              | 7091           | 3/15/2020     | State Personnel  |
| LPAI    | <b>North Carolina</b> | Union 04        | Foam              | 17,877         | 3/15/2020     | State Personnel  |
| LPAI    | <b>North Carolina</b> | Union 05        | Foam              | 16,974         | 3/16/2020     | State Personnel  |
| LPAI    | <b>North Carolina</b> | Union 06        | Foam              | 15,590         | 3/18/2020     | State Personnel  |
| LPAI    | <b>North Carolina</b> | Union 07        | Foam              | 20,070         | 3/18/2020     | State Personnel  |
| LPAI    | <b>North Carolina</b> | Union 08        | Combination       | 45,974         | 3/22/2020     | Company          |
| LPAI    | <b>North Carolina</b> | Union 09        | Foam              | 26,149         | 4/2/2020      | State Personnel  |
| LPAI    | <b>South Carolina</b> | Chesterfield 01 | Foam              | 36,649         | 3/15/2020     | State Personnel  |
| HPAI    | <b>South Carolina</b> | Chesterfield 02 | Foam              | 32,577         | 4/8/2020      | State Personnel  |

| Incident  | Incident Site | Special ID | Production Type                 | Euthanasia Method  | Euth Complete |
|-----------|---------------|------------|---------------------------------|--------------------|---------------|
| LPAI 2021 | California    | NorCal 001 | Live Bird Sales / Non-Slaughter | CO2 Cart/Container | 3/27/2021     |
| LPAI 2021 | California    | NorCal 002 | Backyard Producer               | CO2 Cart/Container | 3/28/2021     |
| LPAI 2021 | Missouri      | Webster 01 | Backyard Producer               | CO2 Cart/Container | 11/11/2020    |
