# Supplementary material for: The Rise of Heatstroke as a Method of Depopulating Pigs and Poultry: Implications for the US Veterinary Profession
Source: MDPI journal article supplement (doi:10.3390/ani13010140), 2022-12-29
Supplement: s1 [file s1]

(b)(3) Section  
1619 of the  
Farm bill

| Premises | Incident Site | Special ID<br>(Investigation) | Production Type (Animal Business) | Incident  | Euthanasia Method  | Euthanasia<br>Completed |
|----------|---------------|-------------------------------|-----------------------------------|-----------|--------------------|-------------------------|
|          | Iowa          | Adair 01                      | Commercial Table Egg Layer        | HPAI 2015 | Foam               | 6/11/2015               |
|          | Wisconsin     | Barron 01                     | Commercial Turkey Meat Bird       | HPAI 2015 | Foam               | 4/21/2015               |
|          | Wisconsin     | Barron 02                     | Commercial Turkey Meat Bird       | HPAI 2015 | Foam               | 4/25/2015               |
|          | Wisconsin     | Barron 03                     | Commercial Turkey Meat Bird       | HPAI 2015 | Foam               | 4/29/2015               |
|          | Wisconsin     | Barron 04                     | Commercial Breeder Operation      | HPAI 2015 | Foam               | 5/3/2015                |
|          | Wisconsin     | Barron 05                     | Commercial Breeder Operation      | HPAI 2015 | Foam               | 5/6/2015                |
|          | South Dakota  | Beadle 01                     | Commercial Turkey Meat Bird       | HPAI 2015 | Foam               | 4/8/2015                |
|          | Washington    | Benton 01                     | Backyard Producer                 | HPAI 2015 | CO2 Gart/Container | 1/5/2015                |
|          | Washington    | Benton 02                     | Backyard Producer                 | HPAI 2015 | CO2 Gart/Container | 1/6/2015                |
|          | Minnesota     | Blue Earth 01                 | Commercial Turkey Meat Bird       | HPAI 2015 | Foam               | 5/31/2015               |
|          | Arkansas      | Boone 01                      | Commercial Broiler Production     | HPAI 2015 | Foam               | 3/11/2015               |
|          | Minnesota     | Brown 01                      | Commercial Turkey Meat Bird       | HPAI 2015 | Foam               | 5/28/2015               |
|          | Minnesota     | Brown 02                      | Commercial Breeder Operation      | HPAI 2015 | Captive Bolt/ TEDS | 5/28/2015               |
|          | Minnesota     | Brown 03                      | Commercial Turkey Meat Bird       | HPAI 2015 | Foam               | 5/31/2015               |
|          | Minnesota     | Brown 04                      | Commercial Breeder Operation      | HPAI 2015 | Foam               | 6/1/2015                |
|          | Minnesota     | Brown 05                      | Commercial Turkey Meat Bird       | HPAI 2015 | Foam               | 6/5/2015                |
|          | Iowa          | Buena Vista 01                | Commercial Turkey Meat Bird       | HPAI 2015 | Foam               | 4/20/2015               |
|          | Iowa          | Buena Vista 02                | Commercial Turkey Meat Bird       | HPAI 2015 | Foam               | 5/4/2015                |
|          | Iowa          | Buena Vista 03                | Commercial Turkey Meat Bird       | HPAI 2015 | Foam               | 5/5/2015                |
|          | Iowa          | Buena Vista 04                | Commercial Table Egg Layer        | HPAI 2015 | CO2 Gart/Container | 5/5/2015                |
|          | Iowa          | Buena Vista 05                | Commercial Table Egg Layer        | HPAI 2015 | CO2 Gart/Container | 5/28/2015               |
|          | Iowa          | Buena Vista 06                | Commercial Turkey Meat Bird       | HPAI 2015 | Foam               | 5/5/2015                |
|          | Iowa          | Buena Vista 07                | Commercial Turkey Meat Bird       | HPAI 2015 | Foam               | 5/13/2015               |
|          | Iowa          | Buena Vista 08                | Commercial Turkey Meat Bird       | HPAI 2015 | CO2 Gart/Container | 5/10/2015               |
|          | Iowa          | Buena Vista 09                | Commercial Turkey Meat Bird       | HPAI 2015 | Foam               | 5/12/2015               |
|          | Iowa          | Buena Vista 11                | Commercial Turkey Meat Bird       | HPAI 2015 | Foam               | 5/14/2015               |
|          | Iowa          | Buena Vista 12                | Commercial Turkey Meat Bird       | HPAI 2015 | Foam               | 5/14/2015               |
|          | Iowa          | Buena Vista 13                | Commercial Turkey Meat Bird       | HPAI 2015 | Foam               | 5/12/2015               |
|          | Iowa          | Buena Vista 14                | Commercial Table Egg Pullets      | HPAI 2015 | CO2 Gart/Container | 6/3/2015                |
|          | Iowa          | Buena Vista 15                | Commercial Turkey Meat Bird       | HPAI 2015 | Foam               | 5/14/2015               |
|          | Iowa          | Buena Vista 16                | Commercial Turkey Meat Bird       | HPAI 2015 | Foam               | 5/24/2015               |
|          | Iowa          | Calhoun 01                    | Commercial Turkey Meat Bird       | HPAI 2015 | Foam               | 5/23/2015               |
|          | Iowa          | Calhoun 02                    | Commercial Turkey Meat Bird       | HPAI 2015 | Foam               | 6/2/2015                |
|          | Idaho         | Canyon 02                     | Backyard Producer                 | HPAI 2015 | CO2 Gart/Container | 1/19/2015               |
|          | Iowa          | Cherokee 01                   | Commercial Turkey Meat Bird       | HPAI 2015 | Foam               | 5/10/2015               |
|          | Iowa          | Cherokee 02                   | Commercial Turkey Meat Bird       | HPAI 2015 | Foam               | 5/9/2015                |
|          | Iowa          | Cherokee 03                   | Commercial Turkey Meat Bird       | HPAI 2015 | Foam               | 5/14/2015               |
|          | Iowa          | Cherokee 04                   | Commercial Turkey Meat Bird       | HPAI 2015 | Foam               | 5/14/2015               |
|          | Iowa          | Cherokee 05                   | Commercial Turkey Meat Bird       | HPAI 2015 | Foam               | 5/15/2015               |
|          | Minnesota     | Chippewa 01                   | Commercial Turkey Meat Bird       | HPAI 2015 | Foam               | 4/29/2015               |
|          | Wisconsin     | Chippewa 01                   | Commercial Turkey Meat Bird       | HPAI 2015 | Foam               | 4/24/2015               |

| Premises                                      | Incident Site | Special ID (Investigation)   | Production Type (Animal Business) | Incident  | Euthanasia Method  | Euthanasia Completed |
|-----------------------------------------------|---------------|------------------------------|-----------------------------------|-----------|--------------------|----------------------|
| (b)(3)<br>Section 1619<br>of the Farm<br>bill | Washington    | Clallam 01                   | Backyard Producer                 | HPAI 2015 | CO2 Gart/Container | 1/18/2015            |
|                                               | Minnesota     | Clay 01                      | Commercial Table Egg Layer        | HPAI 2015 | CO2 Gart/Container | 5/7/2015             |
|                                               | Iowa          | Clay 01                      | Commercial Table Egg Layer        | HPAI 2015 | CO2 Gart/Container | 5/8/2015             |
|                                               | Iowa          | Clay 02                      | Commercial Table Egg Pullets      | HPAI 2015 | CO2 Gart/Container | 6/10/2015            |
|                                               | Minnesota     | Cottonwood 01                | Commercial Turkey Meat Bird       | HPAI 2015 | Foam               | 4/13/2015            |
|                                               | Minnesota     | Cottonwood 02                | Commercial Turkey Meat Bird       | HPAI 2015 | Foam               | 4/20/2015            |
|                                               | Oregon        | Deschutes 01                 | Backyard Producer                 | HPAI 2015 | CO2 Gart/Container | 2/17/2015            |
|                                               | North Dakota  | Dickey 01                    | Commercial Turkey Meat Bird       | HPAI 2015 | Foam               | 4/12/2015            |
|                                               | Nebraska      | Dixon 01                     | Commercial Table Egg Layer        | HPAI 2015 | CO2 Gart/Container | 6/5/2015             |
|                                               | Nebraska      | Dixon 02                     | Commercial Table Egg Layer        | HPAI 2015 | CO2 Gart/Container | 6/21/2015            |
|                                               | Nebraska      | Dixon 03                     | Commercial Table Egg Pullets      | HPAI 2015 | CO2 Gart/Container | 6/2/2015             |
|                                               | Nebraska      | Dixon 04                     | Commercial Table Egg Pullets      | HPAI 2015 | CO2 Gart/Container | 6/23/2015            |
|                                               | Nebraska      | Dixon 05                     | Commercial Table Egg Pullets      | HPAI 2015 | CO2 Gart/Container | 6/19/2015            |
|                                               | Nebraska      | Dixon 06                     | Backyard Producer                 | HPAI 2015 | Other              | 6/6/2015             |
|                                               | Oregon        | Douglas 01                   | Backyard Producer                 | HPAI 2015 | CO2 Gart/Container | 12/21/2014           |
|                                               | Iowa          | Hamilton 01                  | Commercial Turkey Meat Bird       | HPAI 2015 | Foam               | 5/28/2015            |
|                                               | Iowa          | Hamilton 02                  | Commercial Turkey Meat Bird       | HPAI 2015 | Other              | 5/31/2015            |
|                                               | Iowa          | Hamilton 03                  | Commercial Turkey Meat Bird       | HPAI 2015 | Foam               | 6/3/2015             |
|                                               | Iowa          | Hamilton 04                  | Commercial Turkey Meat Bird       | HPAI 2015 | Foam               | 6/4/2015             |
|                                               | South Dakota  | Hutchinson 01                | Commercial Turkey Meat Bird       | HPAI 2015 | Foam               | 5/13/2015            |
|                                               | Missouri      | Jasper 01                    | Commercial Turkey Meat Bird       | HPAI 2015 | Foam               | 3/12/2015            |
|                                               | Wisconsin     | Jefferson 01                 | Commercial Table Egg Layer        | HPAI 2015 | CO2 Gart/Container | 4/26/2015            |
|                                               | Wisconsin     | Jefferson 02                 | Commercial Table Egg Layer        | HPAI 2015 | CO2 Gart/Container | 5/14/2015            |
|                                               | Wisconsin     | Jefferson 03                 | Commercial Table Egg Layer        | HPAI 2015 | CO2 Gart/Container | 5/8/2015             |
|                                               | Montana       | Judith Basin 01              | Backyard Producer                 | HPAI 2015 | Other              | 4/3/2015             |
|                                               | Wisconsin     | Juneau 01                    | Backyard Producer                 | HPAI 2015 | CO2 Gart/Container | 4/16/2015            |
|                                               | Minnesota     | Kandiyohi 01                 | Commercial Breeder Operation      | HPAI 2015 | Foam               | 4/10/2015            |
|                                               | Minnesota     | Kandiyohi 02                 | Commercial Turkey Meat Bird       | HPAI 2015 | Foam               | 4/13/2015            |
|                                               | Minnesota     | Kandiyohi 03                 | Commercial Breeder Operation      | HPAI 2015 | Foam               | 4/16/2015            |
|                                               | Minnesota     | Kandiyohi 04                 | Commercial Breeder Operation      | HPAI 2015 | Foam               | 4/20/2015            |
|                                               | Minnesota     | Kandiyohi 05                 | Commercial Turkey Meat Bird       | HPAI 2015 | Foam               | 4/23/2015            |
|                                               | Minnesota     | Kandiyohi 06                 | Commercial Turkey Meat Bird       | HPAI 2015 | Foam               | 4/22/2015            |
|                                               | Minnesota     | Kandiyohi 07                 | Commercial Turkey Meat Bird       | HPAI 2015 | Foam               | 4/22/2015            |
| Minnesota                                     | Kandiyohi 08  | Commercial Turkey Meat Bird  | HPAI 2015                         | Foam      | 4/21/2015          |                      |
| Minnesota                                     | Kandiyohi 09  | Commercial Turkey Meat Bird  | HPAI 2015                         | Foam      | 4/24/2015          |                      |
| Minnesota                                     | Kandiyohi 10  | Commercial Turkey Meat Bird  | HPAI 2015                         | Foam      | 4/26/2015          |                      |
| Minnesota                                     | Kandiyohi 11  | Commercial Breeder Operation | HPAI 2015                         | Foam      | 4/25/2015          |                      |
| Minnesota                                     | Kandiyohi 12  | Commercial Breeder Operation | HPAI 2015                         | Foam      | 4/24/2015          |                      |
| Minnesota                                     | Kandiyohi 13  | Commercial Breeder Operation | HPAI 2015                         | Foam      | 4/25/2015          |                      |
| Minnesota                                     | Kandiyohi 14  | Commercial Turkey Meat Bird  | HPAI 2015                         | Foam      | 4/26/2015          |                      |
| Minnesota                                     | Kandiyohi 15  | Commercial Turkey Meat Bird  | HPAI 2015                         | Foam      | 4/28/2015          |                      |

| Premises                             | Incident Site     | Special ID (Investigation)  | Production Type (Animal Business) | Incident  | Euthanasia Method  | Euthanasia Completed |
|--------------------------------------|-------------------|-----------------------------|-----------------------------------|-----------|--------------------|----------------------|
| (b)(3) Section 1619 of the Farm bill | Minnesota         | Kandiyohi 16                | Commercial Turkey Meat Bird       | HPAI 2015 | Foam               | 4/26/2015            |
|                                      | Minnesota         | Kandiyohi 17                | Commercial Breeder Operation      | HPAI 2015 | Foam               | 4/27/2015            |
|                                      | Minnesota         | Kandiyohi 18                | Commercial Turkey Meat Bird       | HPAI 2015 | Foam               | 4/27/2015            |
|                                      | Minnesota         | Kandiyohi 19                | Commercial Breeder Operation      | HPAI 2015 | Foam               | 4/29/2015            |
|                                      | Minnesota         | Kandiyohi 20                | Commercial Turkey Meat Bird       | HPAI 2015 | Foam               | 4/28/2015            |
|                                      | Minnesota         | Kandiyohi 21                | Commercial Turkey Meat Bird       | HPAI 2015 | Foam               | 4/27/2015            |
|                                      | Minnesota         | Kandiyohi 22                | Commercial Turkey Meat Bird       | HPAI 2015 | Foam               | 4/29/2015            |
|                                      | Minnesota         | Kandiyohi 23                | Commercial Breeder Operation      | HPAI 2015 | Foam               | 4/29/2015            |
|                                      | Minnesota         | Kandiyohi 24                | Commercial Turkey Meat Bird       | HPAI 2015 | Other              | 4/30/2015            |
|                                      | Minnesota         | Kandiyohi 25                | Commercial Breeder Operation      | HPAI 2015 | Captive Bolt/ TEDS | 5/1/2015             |
|                                      | Minnesota         | Kandiyohi 26                | Commercial Turkey Meat Bird       | HPAI 2015 | Foam               | 5/2/2015             |
|                                      | Minnesota         | Kandiyohi 27                | Commercial Turkey Meat Bird       | HPAI 2015 | Foam               | 5/3/2015             |
|                                      | Minnesota         | Kandiyohi 28                | Commercial Turkey Meat Bird       | HPAI 2015 | Other              | 5/2/2015             |
|                                      | Minnesota         | Kandiyohi 29                | Commercial Breeder Operation      | HPAI 2015 | Foam               | 5/3/2015             |
|                                      | Minnesota         | Kandiyohi 30                | Commercial Turkey Meat Bird       | HPAI 2015 | Foam               | 5/6/2015             |
|                                      | Minnesota         | Kandiyohi 31                | Commercial Turkey Meat Bird       | HPAI 2015 | Foam               | 5/5/2015             |
|                                      | Minnesota         | Kandiyohi 32                | Commercial Turkey Meat Bird       | HPAI 2015 | Foam               | 5/9/2015             |
|                                      | Minnesota         | Kandiyohi 33                | Commercial Turkey Meat Bird       | HPAI 2015 | Foam               | 5/17/2015            |
|                                      | Minnesota         | Kandiyohi 34                | Commercial Breeder Operation      | HPAI 2015 | Foam               | 5/29/2015            |
|                                      | Minnesota         | Kandiyohi 35                | Commercial Breeder Operation      | HPAI 2015 | Foam               | 5/26/2015            |
|                                      | Minnesota         | Kandiyohi 36                | Commercial Turkey Meat Bird       | HPAI 2015 | Foam               | 5/29/2015            |
|                                      | Minnesota         | Kandiyohi 37                | Commercial Turkey Meat Bird       | HPAI 2015 | Foam               | 5/28/2015            |
|                                      | Minnesota         | Kandiyohi 38                | Commercial Turkey Meat Bird       | HPAI 2015 | Foam               | 5/28/2015            |
|                                      | Minnesota         | Kandiyohi 39                | Commercial Turkey Meat Bird       | HPAI 2015 | Foam               | 6/2/2015             |
|                                      | Minnesota         | Kandiyohi 40                | Commercial Turkey Meat Bird       | HPAI 2015 | Foam               | 6/6/2015             |
|                                      | California-Tulare | Kings 01                    | Commercial Broiler Production     | HPAI 2015 | Foam               | 2/18/2015            |
|                                      | South Dakota      | Kingsbury 01                | Commercial Turkey Meat Bird       | HPAI 2015 | Foam               | 4/10/2015            |
|                                      | Iowa              | Kossuth 01                  | Commercial Breeder Operation      | HPAI 2015 | CO2 Gart/Container | 5/8/2015             |
|                                      | Minnesota         | Lac Qui Parle 01            | Commercial Turkey Meat Bird       | HPAI 2015 | Foam               | 3/29/2015            |
|                                      | North Dakota      | LaMoure 01                  | Commercial Turkey Meat Bird       | HPAI 2015 | Foam               | 4/23/2015            |
|                                      | Minnesota         | Le Sueur 01                 | Commercial Turkey Meat Bird       | HPAI 2015 | Foam               | 4/14/2015            |
|                                      | Kansas- Basehor   | Leavenworth 01              | Backyard Producer                 | HPAI 2015 | CO2 Gart/Container | 3/14/2015            |
|                                      | Missouri          | Lewis 01                    | Backyard Producer                 | HPAI 2015 | Other              | 5/3/2015             |
|                                      | Minnesota         | Lyon 01                     | Commercial Turkey Meat Bird       | HPAI 2015 | Foam               | 4/12/2015            |
|                                      | Iowa              | Lyon 01                     | Commercial Table Egg Layer        | HPAI 2015 | CO2 Gart/Container | 5/29/2015            |
|                                      | Iowa              | Madison 01                  | Commercial Table Egg Layer        | HPAI 2015 | CO2 Gart/Container | 5/16/2015            |
|                                      | South Dakota      | McCook 01                   | Commercial Turkey Meat Bird       | HPAI 2015 | Foam               | 4/13/2015            |
|                                      | South Dakota      | McPherson 01                | Commercial Turkey Meat Bird       | HPAI 2015 | Foam               | 4/15/2015            |
|                                      | Minnesota         | Meeker 01                   | Commercial Turkey Meat Bird       | HPAI 2015 | Foam               | 4/14/2015            |
|                                      | Minnesota         | Meeker 02                   | Commercial Turkey Meat Bird       | HPAI 2015 | Foam               | 4/21/2015            |
| Minnesota                            | Meeker 03         | Commercial Turkey Meat Bird | HPAI 2015                         | Foam      | 4/19/2015          |                      |

| Premises                                      | Incident Site | Special ID (Investigation) | Production Type (Animal Business) | Incident  | Euthanasia Method  | Euthanasia Completed |
|-----------------------------------------------|---------------|----------------------------|-----------------------------------|-----------|--------------------|----------------------|
| (b)(3)<br>Section<br>1619 of the<br>Farm bill | Minnesota     | Meeker 04                  | Commercial Turkey Meat Bird       | HPAI 2015 | Foam               | 4/23/2015            |
|                                               | Minnesota     | Meeker 05                  | Commercial Turkey Meat Bird       | HPAI 2015 | Foam               | 4/26/2015            |
|                                               | Minnesota     | Meeker 06                  | Commercial Breeder Operation      | HPAI 2015 | Foam               | 4/26/2015            |
|                                               | Minnesota     | Meeker 07                  | Commercial Turkey Meat Bird       | HPAI 2015 | Foam               | 4/25/2015            |
|                                               | Minnesota     | Meeker 08                  | Commercial Breeder Operation      | HPAI 2015 | Foam               | 5/2/2015             |
|                                               | Minnesota     | Meeker 09                  | Commercial Turkey Meat Bird       | HPAI 2015 | Foam               | 5/16/2015            |
|                                               | Minnesota     | Meeker 10                  | Commercial Breeder Operation      | HPAI 2015 | Foam               | 5/29/2015            |
|                                               | Missouri      | Moniteau 01                | Commercial Turkey Meat Bird       | HPAI 2015 | Foam               | 3/10/2015            |
|                                               | South Dakota  | Moody 01                   | Commercial Table Egg Layer        | HPAI 2015 | CO2 Gart/Container | 6/12/2015            |
|                                               | South Dakota  | Moody 02                   | Commercial Turkey Meat Bird       | HPAI 2015 | Foam               | 5/30/2015            |
|                                               | Minnesota     | Nicollet 01                | Commercial Table Egg Layer        | HPAI 2015 | CO2 Gart/Container | 5/22/2015            |
|                                               | Minnesota     | Nobles 01                  | Commercial Turkey Meat Bird       | HPAI 2015 | Foam               | 4/3/2015             |
|                                               | Iowa          | O'Brien 01                 | Commercial Table Egg Layer        | HPAI 2015 | CO2 Gart/Container | 5/6/2015             |
|                                               | Iowa          | O'Brien 02                 | Commercial Table Egg Layer        | HPAI 2015 | CO2 Gart/Container | 5/2/2015             |
|                                               | Iowa          | O'Brien 03                 | Backyard Producer                 | HPAI 2015 | Other              | 5/9/2015             |
|                                               | Washington    | Okanogan 01                | Backyard Producer                 | HPAI 2015 | CO2 Gart/Container | 2/3/2015             |
|                                               | Washington    | Okanogan 02                | Backyard Producer                 | HPAI 2015 | CO2 Gart/Container | 2/4/2015             |
|                                               | Iowa          | Osceola 01                 | Commercial Table Egg Layer        | HPAI 2015 | CO2 Gart/Container | 5/7/2015             |
|                                               | Iowa          | Osceola 02                 | Commercial Table Egg Pullets      | HPAI 2015 | CO2 Gart/Container | 5/20/2015            |
|                                               | Iowa          | Osceola 03                 | Commercial Table Egg Pullets      | HPAI 2015 | CO2 Gart/Container | 5/15/2015            |
|                                               | Iowa          | Osceola 04                 | Backyard Producer                 | HPAI 2015 | Other              | 5/22/2015            |
|                                               | Minnesota     | Otter Tail 01              | Commercial Breeder Operation      | HPAI 2015 | Foam               | 4/22/2015            |
|                                               | Minnesota     | Otter Tail 02              | Commercial Turkey Meat Bird       | HPAI 2015 | Foam               | 4/24/2015            |
|                                               | Minnesota     | Otter Tail 03              | Commercial Turkey Meat Bird       | HPAI 2015 | Foam               | 5/1/2015             |
|                                               | Minnesota     | Otter Tail 04              | Commercial Breeder Operation      | HPAI 2015 | Foam               | 4/22/2015            |
|                                               | Iowa          | Palo Alto 01               | Commercial Turkey Meat Bird       | HPAI 2015 | Foam               | 5/15/2015            |
|                                               | Minnesota     | Pipestone 01               | Backyard Producer                 | HPAI 2015 | Foam               | 4/20/2015            |
|                                               | Minnesota     | Pipestone 02               | Commercial Turkey Meat Bird       | HPAI 2015 | Foam               | 5/4/2015             |
|                                               | Iowa          | Plymouth 01                | Commercial Table Egg Pullets      | HPAI 2015 | CO2 Gart/Container | 6/5/2015             |
|                                               | Iowa          | Pocahontas 01              | Commercial Turkey Meat Bird       | HPAI 2015 | CO2 Gart/Container | 5/6/2015             |
|                                               | Iowa          | Pocahontas 02              | Commercial Turkey Meat Bird       | HPAI 2015 | Foam               | 5/12/2015            |
|                                               | Iowa          | Pocahontas 04              | Commercial Turkey Meat Bird       | HPAI 2015 | Foam               | 5/24/2015            |
|                                               | Minnesota     | Pope 01                    | Commercial Breeder Operation      | HPAI 2015 | Foam               | 3/7/2015             |
|                                               | Minnesota     | Pope 02                    | Commercial Breeder Operation      | HPAI 2015 | Foam               | 3/7/2015             |
|                                               | Minnesota     | Redwood 01                 | Commercial Turkey Meat Bird       | HPAI 2015 | Foam               | 4/16/2015            |
|                                               | Minnesota     | Redwood 02                 | Commercial Turkey Meat Bird       | HPAI 2015 | Foam               | 4/21/2015            |
|                                               | Minnesota     | Redwood 03                 | Commercial Turkey Meat Bird       | HPAI 2015 | Foam               | 4/16/2015            |
|                                               | Minnesota     | Redwood 04                 | Commercial Turkey Meat Bird       | HPAI 2015 | Foam               | 4/21/2015            |
|                                               | Minnesota     | Renville 01                | Commercial Turkey Meat Bird       | HPAI 2015 | Foam               | 5/4/2015             |
|                                               | Minnesota     | Renville 02                | Commercial Table Egg Layer        | HPAI 2015 | CO2 Gart/Container | 6/1/2015             |
|                                               | Minnesota     | Renville 03                | Commercial Turkey Meat Bird       | HPAI 2015 | Foam               | 5/28/2015            |

(b)(3) Section  
1619 of the  
Farm bill

| Premises | Incident Site | Special ID (Investigation) | Production Type (Animal Business) | Incident  | Euthanasia Method  | Euthanasia Completed |
|----------|---------------|----------------------------|-----------------------------------|-----------|--------------------|----------------------|
|          | Minnesota     | Renville 04                | Commercial Turkey Meat Bird       | HPAI 2015 | Foam               | 5/31/2015            |
|          | Minnesota     | Renville 05                | Commercial Breeder Operation      | HPAI 2015 | Foam               | 6/2/2015             |
|          | Minnesota     | Renville 06                | Commercial Turkey Meat Bird       | HPAI 2015 | Foam               | 5/30/2015            |
|          | Minnesota     | Renville 07                | Commercial Table Egg Pullets      | HPAI 2015 | CO2 Gart/Container | 6/10/2015            |
|          | Minnesota     | Renville 08                | Commercial Turkey Meat Bird       | HPAI 2015 | Foam               | 6/4/2015             |
|          | South Dakota  | Roberts 01                 | Commercial Turkey Meat Bird       | HPAI 2015 | Foam               | 4/16/2015            |
|          | Minnesota     | Roseau 01                  | Commercial Turkey Meat Bird       | HPAI 2015 | Foam               | 4/20/2015            |
|          | Iowa          | Sac 01                     | Commercial Turkey Meat Bird       | HPAI 2015 | Foam               | 4/30/2015            |
|          | Iowa          | Sac 02                     | Commercial Turkey Meat Bird       | HPAI 2015 | Foam               | 5/10/2015            |
|          | Iowa          | Sac 03                     | Commercial Turkey Meat Bird       | HPAI 2015 | Foam               | 5/15/2015            |
|          | Iowa          | Sac 04                     | Commercial Turkey Meat Bird       | HPAI 2015 | Foam               | 5/20/2015            |
|          | Iowa          | Sac 05                     | Commercial Turkey Meat Bird       | HPAI 2015 | Foam               | 5/19/2015            |
|          | Iowa          | Sac 06                     | Commercial Turkey Meat Bird       | HPAI 2015 | Foam               | 5/22/2015            |
|          | Iowa          | Sac 07                     | Commercial Turkey Meat Bird       | HPAI 2015 | Foam               | 5/31/2015            |
|          | Iowa          | Sac 08                     | Commercial Turkey Meat Bird       | HPAI 2015 | Foam               | 6/5/2015             |
|          | Iowa          | Sioux 01                   | Commercial Table Egg Layer        | HPAI 2015 | CO2 Gart/Container | 5/12/2015            |
|          | Iowa          | Sioux 02                   | Commercial Table Egg Layer        | HPAI 2015 | CO2 Gart/Container | 5/20/2015            |
|          | Iowa          | Sioux 03                   | Commercial Table Egg Layer        | HPAI 2015 | CO2 Gart/Container | 5/13/2015            |
|          | Iowa          | Sioux 04                   | Commercial Table Egg Layer        | HPAI 2015 | CO2 Gart/Container | 5/11/2015            |
|          | Iowa          | Sioux 05                   | Commercial Table Egg Pullets      | HPAI 2015 | CO2 Gart/Container | 5/23/2015            |
|          | Iowa          | Sioux 06                   | Commercial Table Egg Layer        | HPAI 2015 | CO2 Gart/Container | 5/19/2015            |
|          | Iowa          | Sioux 07                   | Commercial Table Egg Pullets      | HPAI 2015 | CO2 Gart/Container | 5/15/2015            |
|          | Iowa          | Sioux 08                   | Commercial Table Egg Pullets      | HPAI 2015 | CO2 Gart/Container | 5/28/2015            |
|          | Iowa          | Sioux 09                   | Commercial Table Egg Pullets      | HPAI 2015 | CO2 Gart/Container | 5/16/2015            |
|          | Iowa          | Sioux 10                   | Commercial Table Egg Layer        | HPAI 2015 | CO2 Gart/Container | 5/29/2015            |
|          | Iowa          | Sioux 13                   | Commercial Table Egg Layer        | HPAI 2015 | CO2 Gart/Container | 5/23/2015            |
|          | Iowa          | Sioux 14                   | Commercial Table Egg Pullets      | HPAI 2015 | CO2 Gart/Container | 5/29/2015            |
|          | Iowa          | Sioux 15                   | Backyard Producer                 | HPAI 2015 | Other              | 6/3/2015             |
|          | Iowa          | Sioux 16                   | Backyard Producer                 | HPAI 2015 | Other              | 6/4/2015             |
|          | Iowa          | Sioux 17                   | Backyard Producer                 | HPAI 2015 | CO2 Gart/Container | 5/30/2015            |
|          | Iowa          | Sioux 18                   | Commercial Table Egg Pullets      | HPAI 2015 | CO2 Gart/Container | 5/31/2015            |
|          | Iowa          | Sioux 19                   | Commercial Table Egg Layer        | HPAI 2015 | CO2 Gart/Container | 6/1/2015             |
|          | Iowa          | Sioux 20                   | Mail Order Hatchery               | HPAI 2015 | CO2 Gart/Container | 6/12/2015            |
|          | South Dakota  | Spink 01                   | Commercial Turkey Meat Bird       | HPAI 2015 | Foam               | 4/21/2015            |
|          | California    | Stanislaus 01              | Commercial Turkey Meat Bird       | HPAI 2015 | Other              | 1/30/2015            |
|          | Minnesota     | Stearns 01                 | Commercial Turkey Meat Bird       | HPAI 2015 | Foam               | 3/30/2015            |
|          | Minnesota     | Stearns 02                 | Commercial Turkey Meat Bird       | HPAI 2015 | Foam               | 4/5/2015             |
|          | Minnesota     | Stearns 03                 | Commercial Turkey Meat Bird       | HPAI 2015 | Foam               | 4/8/2015             |
|          | Minnesota     | Stearns 04                 | Commercial Turkey Meat Bird       | HPAI 2015 | Foam               | 4/14/2015            |
|          | Minnesota     | Stearns 05                 | Commercial Turkey Meat Bird       | HPAI 2015 | Foam               | 4/15/2015            |
|          | Minnesota     | Stearns 06                 | Commercial Turkey Meat Bird       | HPAI 2015 | Foam               | 4/19/2015            |

| Premises                             | Incident Site | Special ID (Investigation)  | Production Type (Animal Business) | Incident             | Euthanasia Method    | Euthanasia Completed |
|--------------------------------------|---------------|-----------------------------|-----------------------------------|----------------------|----------------------|----------------------|
| (b)(3) Section 1619 of the Farm bill | Minnesota     | Stearns 07                  | Commercial Turkey Meat Bird       | HPAI 2015            | Foam                 | 4/26/2015            |
|                                      | Minnesota     | Stearns 08                  | Commercial Turkey Meat Bird       | HPAI 2015            | Foam                 | 4/24/2015            |
|                                      | Minnesota     | Stearns 09                  | Commercial Turkey Meat Bird       | HPAI 2015            | Foam                 | 4/26/2015            |
|                                      | Minnesota     | Stearns 10                  | Commercial Turkey Meat Bird       | HPAI 2015            | Foam                 | 4/27/2015            |
|                                      | Minnesota     | Stearns 11                  | Commercial Breeder Operation      | HPAI 2015            | Foam                 | 4/27/2015            |
|                                      | Minnesota     | Stearns 12                  | Commercial Table Egg Layer        | HPAI 2015            | CO2 Gart/Container   | 5/11/2015            |
|                                      | Minnesota     | Stearns 13                  | Commercial Breeder Operation      | HPAI 2015            | Foam                 | 4/27/2015            |
|                                      | Minnesota     | Stearns 14                  | Commercial Turkey Meat Bird       | HPAI 2015            | Foam                 | 5/1/2015             |
|                                      | Minnesota     | Steele 01                   | Commercial Turkey Meat Bird       | HPAI 2015            | Foam                 | 4/29/2015            |
|                                      | Minnesota     | Swift 01                    | Commercial Turkey Meat Bird       | HPAI 2015            | Foam                 | 4/16/2015            |
|                                      | Minnesota     | Swift 02                    | Commercial Turkey Meat Bird       | HPAI 2015            | Foam                 | 4/19/2015            |
|                                      | Minnesota     | Swift 03                    | Commercial Turkey Meat Bird       | HPAI 2015            | Foam                 | 4/29/2015            |
|                                      | Minnesota     | Swift 04                    | Commercial Turkey Meat Bird       | HPAI 2015            | Captive Bolt/ TEDS   | 5/4/2015             |
|                                      | Minnesota     | Swift 05                    | Commercial Turkey Meat Bird       | HPAI 2015            | Foam                 | 5/5/2015             |
|                                      | Minnesota     | Swift 06                    | Commercial Turkey Meat Bird       | HPAI 2015            | Foam                 | 5/9/2015             |
|                                      | Minnesota     | Swift 07                    | Commercial Turkey Meat Bird       | HPAI 2015            | Foam                 | 5/12/2015            |
|                                      | Minnesota     | Wadena 01                   | Commercial Turkey Meat Bird       | HPAI 2015            | Foam                 | 4/25/2015            |
|                                      | Minnesota     | Watonwan 01                 | Commercial Turkey Meat Bird       | HPAI 2015            | Foam                 | 4/12/2015            |
|                                      | Iowa          | Webster 01                  | Commercial Table Egg Layer        | HPAI 2015            | CO2 Gart/Container   | 6/6/2015             |
|                                      | Indiana       | Whitley 01                  | Backyard Producer                 | HPAI 2015            | CO2 Gart/Container   | 5/9/2015             |
|                                      | Iowa          | Wright 01                   | Commercial Table Egg Layer        | HPAI 2015            | CO2 Gart/Container   | 6/12/2015            |
|                                      | Iowa          | Wright 02                   | Commercial Table Egg Layer        | HPAI 2015            | CO2 Gart/Container   | 6/2/2015             |
|                                      | Iowa          | Wright 03                   | Commercial Table Egg Pullets      | HPAI 2015            | CO2 Gart/Container   | 6/6/2015             |
|                                      | Iowa          | Wright 04                   | Commercial Table Egg Layer        | HPAI 2015            | CO2 Gart/Container   | 5/31/2015            |
|                                      | Iowa          | Wright 05                   | Commercial Table Egg Pullets      | HPAI 2015            | CO2 Gart/Container   | 6/12/2015            |
|                                      | Iowa          | Wright 06                   | Commercial Table Egg Layer        | HPAI 2015            | CO2 Gart/Container   | 6/20/2015            |
|                                      | South Dakota  | Yankton 01                  | Commercial Turkey Meat Bird       | HPAI 2015            | Foam                 | 5/13/2015            |
|                                      | Indiana       | Dubois 01                   | Commercial Turkey Meat Bird       | HPAI 2016            | Foam                 | 1/16/2016            |
|                                      | Indiana       | Dubois 01a                  | Commercial Turkey Meat Bird       | HPAI 2016            | Foam                 | 1/15/2016            |
|                                      | Indiana       | Dubois 02                   | Commercial Turkey Meat Bird       | HPAI 2016            | Ventilation Shutdown | 1/17/2016            |
|                                      | Indiana       | Dubois 03                   | Commercial Turkey Meat Bird       | HPAI 2016            | Foam                 | 1/20/2016            |
|                                      | Indiana       | Dubois 04                   | Commercial Turkey Meat Bird       | HPAI 2016            | Ventilation Shutdown | 1/16/2016            |
|                                      | Indiana       | Dubois 05                   | Commercial Turkey Meat Bird       | HPAI 2016            | Foam                 | 1/16/2016            |
|                                      | Indiana       | Dubois 05a                  | Commercial Table Egg Layer        | HPAI 2016            | Ventilation Shutdown | 1/19/2016            |
| Indiana                              | Dubois 06     | Commercial Turkey Meat Bird | HPAI 2016                         | Ventilation Shutdown | 1/16/2016            |                      |
| Indiana                              | Dubois 07     | Commercial Turkey Meat Bird | HPAI 2016                         | Other                | 1/20/2016            |                      |
| Indiana                              | Dubois 08     | Commercial Turkey Meat Bird | HPAI 2016                         | Captive Bolt/ TEDS   | 1/19/2016            |                      |
| Indiana                              | Dubois 09     | Commercial Turkey Meat Bird | HPAI 2016                         | Other                | 1/17/2016            |                      |
| Indiana                              | Dubois 10     | Commercial Turkey Meat Bird | HPAI 2016                         | Other                | 1/18/2016            |                      |
|                                      |               |                             |                                   |                      |                      |                      |
|                                      |               |                             |                                   |                      |                      |                      |
